1 **Neck muscle spindle noise biases reaches in a multi-**  
2 **sensory integration task**

3

4

5

6 Parisa Abedi Khoozani<sup>1,2</sup>, Gunnar Blohm<sup>1,2,3</sup>

7

8

9 <sup>1</sup>Centre for Neuroscience Studies, Queen's University, Kingston, Ontario,  
10 Canada

11 <sup>2</sup>Canadian Action and Perception Network (CAPnet), Toronto, Ontario, Canada

12 <sup>3</sup>Association for Canadian Neuroinformatics and Computational Neuroscience  
13 (CNCN), Kingston, Ontario, Canada

14

## 15 **Abstract**

16 Reference frame Transformations (RFTs) are crucial components of  
17 sensorimotor transformations in the brain. Stochasticity in RFTs has been  
18 suggested to add noise to the transformed signal due to variability in  
19 transformation parameter estimates (e.g. angle) as well as the stochastic nature  
20 of computations in spiking networks of neurons. Here, we varied the RFT angle  
21 together with the associated variability and evaluated the behavioral impact in a  
22 reaching task that required variability-dependent visual-proprioceptive multi-  
23 sensory integration. Crucially, reaches were performed with the head either  
24 straight or rolled 30deg to either shoulder and we also applied neck loads of 0 or  
25 1.8kg (left or right) in a 3x3 design, resulting in different combinations of  
26 estimated head roll angle magnitude and variance required in RFTs. A novel 3D  
27 stochastic model of multi-sensory integration across reference frames was fitted  
28 to the data and captured our main behavioral findings: (1) neck load biased head  
29 angle estimation across all head roll orientations resulting in systematic shifts in  
30 reach errors; (2) Increased neck muscle tone led to increased reach variability,  
31 due to signal-dependent noise; (3) both head roll and neck load created larger  
32 angular errors in reaches to visual targets away from the body compared to  
33 reaches toward the body. These results show that noise in muscle spindles and  
34 stochasticity in general have a tangible effect on RFTs underlying reach  
35 planning. Since RFTs are omnipresent in the brain, our results could have  
36 implication for processes as diverse as motor control, decision making, posture /  
37 balance control, and perception.

38

39 **New & Noteworthy:** We show that increasing neck muscle tone systematically  
40 biases reach movements. A novel 3D multisensory integration across reference  
41 frames model captures the data well and provides evidence that the brain must  
42 have online knowledge of full body geometry together with the associated  
43 variability to accurately plan reach movements.

## 44 **Introduction**

45           Different sensory and motor signals are encoded in different coordinates  
46 in the brain, e.g. early vision in eye/gaze-centered, primary arm proprioception in  
47 shoulder-centered. Conversions between reference frames are vital to transform  
48 signals into reference frames that are appropriate for processes as diverse as  
49 motor control, decision making, posture / balance control, and perception  
50 (Flanders et al., 1992; Buneo et al., 2002; Vetter et al., 1999; Blohm & Crawford,  
51 2007). Previous studies have suggested that reference frame transformations  
52 (RFTs) should be regarded as stochastic processes which modulate the reliability  
53 of transformed signals (Alikhanian et al., 2015, Schlicht & Shrater, 2007; Burns &  
54 Blohm, 2010, 2011). Furthermore, several studies proposed that humans flexibly  
55 select the coordinates that minimize the effect of stochasticity (Sober & Sabes,  
56 2005). Cue reliability-based multi-sensory integration studies have shown that  
57 stochastic RFTs affect human behavior (Schlicht & Shrater, 2007; Burns &  
58 Blohm, 2010, 2011); however, the sources of stochasticity in RFTs as well as the  
59 underlying mechanisms of how RFTs affect transformed signals remain unclear.

60           In order to accurately perform RFTs, the brain must have an estimate of  
61 3D body articulation (Blohm & Crawford, 2007); i.e. an internal estimate of  
62 different body parts with regard to each other (such as eye re. head translation)  
63 as well as an estimate of joint angles (such as head/eye orientations). While the  
64 former is likely learned and does not change, the latter could stem from at least 2  
65 sources, noisy afferent sensory signals (proprioception) and efferent copies of  
66 motor commands. Both signals are inherently variable due to the uncertainty of

67 sensory reading and the variability of neuronal spiking (Poisson noise). Several  
68 studies have suggested that varying body articulation, e.g. the head roll angle,  
69 increases the behavioral variability due to signal-dependent sensory and neural  
70 noise affecting the RFT (Alikhanian et al., 2015; Schlicht & Shrater, 2007; Burns  
71 & Blohm, 2010, 2011). Signal-dependent sensory noise can arise from variability  
72 in the muscle spindle activity, the vestibular system, or both (Lechner-  
73 Steinleitner, 1987; Scott & Loeb, 1994; Cordo et al., 2002; Sadeghi et al., 2007;  
74 Faisal et al., 2008). Thus, larger joint angle estimates are accompanied by higher  
75 uncertainty (Wade & Curthoys, 1997; Van Beuzekom & Van Gisbergen, 2000;  
76 Blohm & Crawford, 2007), which results in an increased trial-to-trial variability in  
77 the RFT.

78         The effect of stochastic RFTs on the reliability of transformed signals has  
79 been studied using a multi-sensory integration task. Multisensory integration  
80 combines different sources of sensory information to create the best possible  
81 estimate of the state of our body within the environment in a way that is generally  
82 well captured by Bayes-optimal integration (Stein & Meredith, 1993; Landy et al.,  
83 1995; Atkins et al., 2001; Landy & Kojima, 2001; Kersten et al., 2004; Stein &  
84 Stanford, 2008; Ernst & Banks, 2002; Knill & Pouget, 2004). For instance, both  
85 visual and proprioceptive information can be combined in a reliability-weighted  
86 fashion to estimate hand position. It is believed (weak fusion hypothesis, Clark &  
87 Yuille, 1990) that prior to integration any signals must first be converted into a  
88 common coordinate system; this requires a (stochastic) RFT. Within this  
89 framework, the reliability of the transformed signal is affected by stochasticity in

90 RFTs (Alikhanian et al., 2015), thus modulating the multisensory integration  
91 weights (Burns & Blohm, 2010; Burns et al., 2011). However, it is not clear how  
92 varying multisensory weights due to stochastic RFTs affects reaching  
93 movements to visual targets.

94 Here, we deployed a modified version of the standard visual-  
95 proprioceptive integration-based reaching task (Van Beers et al., 1999; Sober &  
96 Sabes, 2003, 2005) to systematically investigate the behavioral consequences of  
97 biases and variability in sensory estimates used for stochastic RFTs. We asked  
98 human participants to perform a center-out reaching task while the seen and  
99 actual hand positions were dissociated. In addition, reaches were performed with  
100 the head either straight or rolled 30deg to either shoulder and we also applied  
101 neck loads of 0 or 1.8kg (left or right) in a 3x3 design. Our results demonstrate  
102 that applying the neck load increased the variability of reach movements and  
103 biased the reaching behavior toward the applied load in all head roll orientations.  
104 Our prediction was that these effects on reaching behavior can be explained by a  
105 change in multisensory integration weights due to stochastic RFTs, which  
106 consequently enabled us to quantify the relative contribution of neck muscle  
107 spindles to the estimation of head roll angle. To test this hypothesis, we  
108 implemented a novel 3D stochastic model of multisensory integration across  
109 reference frames. Our model was able to capture the pattern of behavioral data  
110 well and allowed us to make two main conclusions: the effect of neck load on  
111 reaching behavior can be explained by changes in multisensory weights due to

112 stochastic RFTs and the source of this stochasticity in RFTs is signal-dependent  
113 noise.

## 114 **Material and Method**

### 115 **Participants**

116           Nine healthy humans (8 male) between 20 to 35 years of age with normal  
117 or corrected to normal vision participated in our reaching task. They performed  
118 their reaching with their dominant right hand. Experimental conditions were  
119 approved by the Queen's University General Board of Ethics and all the  
120 participants gave their written consent. Monetary compensation was provided for  
121 participating in the experiment (\$10/hour).

### 122 **Apparatus**

123           A virtual reality robotic setup (KINARM End Point Robot, BKIN  
124 Technologies) was used for performing the center-out reaching task. Participants  
125 stood in front of the robot while positioning their head by resting the forehead on  
126 the robot in front of the screen and their chin on a chinrest. Participants grasped  
127 a vertical handle attached to the robotic arm in order to reach to the viewed  
128 target on the mirrored surface. The vision of participants' hand was occluded  
129 using an opaque board and eye movements were tracked using embedded  
130 technology (Eyelink 1000, SR Research). A pulley system and a helmet were  
131 used for measuring the head roll and loading the neck (see Figure 1 A and C).

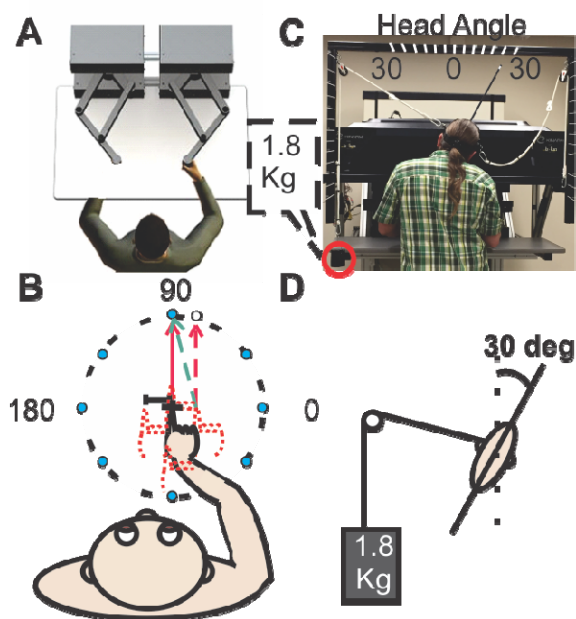

**Figure 1. Apparatus-** A) KINARM end point robot (BKIN technology website) arrangement. B) Visual targets were distributed evenly on a 10cm-radius circle. The hand was shifted 2.5cm either vertically or horizontally while the visual indicator stayed at the center. C) Picture of the pulley system for measuring the head roll and loading the neck, in this picture the participant had 30CW HR and neck load on the left side. The attached indicator on the helmet was used to measure the head angle.

132

### 133 Task Design

134 Participants stood in front of the robot and grasped the handle. At the  
135 beginning of each trial, participants were instructed to position their hand on the  
136 start position (cross) in the center of the display field. The robotic arm moved the  
137 hand toward the center and released it when the hand was within 3 centimeter of  
138 the central cross; a red dot representing hand position appeared at this point.  
139 After the participant positioned the hand correctly on the cross, one of the eight  
140 targets, distributed evenly on the circle with radius 10 cm, appeared. Participants  
141 were instructed to move through the target quickly and accurately while keeping  
142 their gaze fixated on the center cross. Once the participant's hand began to  
143 move (85 mm/s velocity threshold), the hand cursor disappeared. If they reached  
144 the target in less than 750ms, the trial was successful and participants would  
145 hear a successes beep, otherwise a failure beep was played indicating that the  
146 trial had been aborted and would have to be repeated. At the end of each trial,



147 the center cross disappeared and participants had to wait 500ms to start the next  
148 trial. The next trial started with the reappearance of the center cross and the  
149 movement of the robotic arm driving the participant's hand to the start position.  
150 This was to ensure that participants did not have visual feedback of their  
151 previous trial's performance.

152         There were several different conditions in our experiment: The hand was  
153 physically shifted randomly either up/down or left/right with respect to the visual  
154 feedback of the hand. For example, participants would align their hand cursor to  
155 the center cross while their actual hand position was 2.5cm left of the cross. This  
156 discrepancy was introduced to enable us to measure the relative weighting of  
157 vision and proprioception in the multisensory integration process, similar to the  
158 logic employed in Sober and Sabes (2003, 5005) and Burns and Blohm (2010).  
159 In addition, the reaching movements were performed while the participants either  
160 kept their head straight or rolled their head 30deg toward each shoulder and  
161 while a neck load (0 or 1.8kg) was applied to the left or right side (the value of the  
162 weight was chosen to stimulate the same force as a 30deg head roll on neck  
163 muscles). Combinations of different head roll (HR) and neck load (NL) conditions  
164 are shown in Figure 2. We hypothesized that altering head roll and neck muscle  
165 force would create a conflict for head roll estimation as well as changing the  
166 signal-dependent noise which will affect the weights of multi-sensory integration.  
167 Participants completed 640 trials (5 hand positions \* 8 targets \* 16 repetitions) for  
168 each of the 9 combinations of head roll/neck load, for a total of 5760 trials  
169 (640\*9) in 6 one hour sessions. In order to avoid any biases due to a specific

170 order of experiment conditions, we employed Latin squares method to counter  
171 balance among different experimental conditions (Jacobson & Matthews, 1996).

172

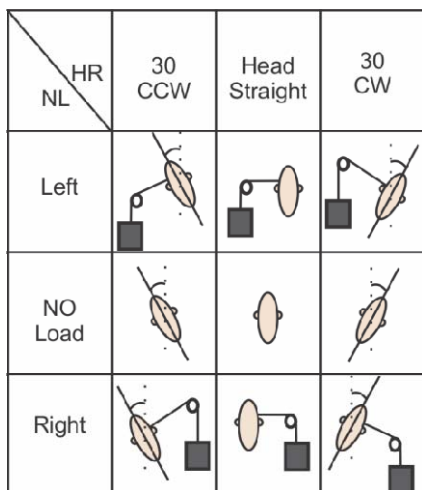

**Figure 2. Experimental conditions.**

Participants performed the reaching task under 9 different combinations of HR and NL conditions during our experiment.

173

## 174 Data Analysis

175 Hand and eye movement were captured with sampling rates of 1000Hz  
176 and 500Hz respectively. MATLAB software was used for offline analysis: A low-  
177 pass filter (autoregressive forward-backward filter, cutoff frequency = 50 Hz) was  
178 used to smooth the acquired data. First and second derivative of hand position  
179 data was calculated (using a central difference algorithm) to obtain hand velocity  
180 and acceleration. Trials in which participants moved their eyes after the visual  
181 target is displayed or moved their hand in a predictive direction except the target  
182 direction were removed (3% of overall trials). The time span from when  
183 participants started to move until their hand crossed a 9cm circle is defined as  
184 the initial movement duration. Movements were typically straight and had very  
185 little curvature; thus movement angle was derived through regression of data  
186 points acquired throughout the initial movement duration. Since the visual and

187 proprioceptive hand position was dissociated, we defined visual movement as  
188 the movement obtained when subtracting visual hand from target information  
189 (red arrow, Figure 1B) and proprioceptive movement as the movement direction  
190 obtained when subtracting proprioceptive hand position from the visual target  
191 information (green arrow, Figure 1B). Subtracting predicted visual  
192 (proprioceptive) movement from the measured movement angle yielded the  
193 directional visual (proprioceptive) movement errors, which we used for our  
194 analysis. We then used an analytical model to capture the pattern of movement  
195 errors measured across conditions and targets (see model description below).

196

### 197 **Statistical Analysis**

198 An n-way repeated measure ANOVA (rm-ANOVA) was used to assess the  
199 statistical differences (MATLAB 2013a, anovan.m) and post-Hoc analysis using  
200 the Bonferroni criterion (MATLAB 2013a, multcompare.m) was performed to  
201 assess the interaction between different parameters. A paired t-test (MATLAB  
202 2013a, ttest.m) was used to assess the statistical significance in reach error  
203 variability for different head roll and neck load conditions. In all the statistical  
204 analysis  $p < 0.001$  was considered as the criterion for statistical significance.

205

### 206 **Model description**

207 The goal of our model was to understand which intrinsic and extrinsic variables  
208 were required to perform the RFTs accurately and more importantly, how  
209 variation of such variables affects human movement behavior. In order to

210 understand the effect of RFTs on reach planning, we first explain the required  
211 steps in our model to plan a reach movement. Sober and Sabes (2003) proposed  
212 a two-step model for planning a reach movement in which first a movement plan  
213 is calculated by subtracting the hand position from the target position. Then this  
214 movement plan transformed to a desired change in arm angles through  
215 performing inverse kinematics. We extended previous models (Sober & Sabes,  
216 2003; Burns & Blohm, 2010) that considered two steps for planning a reach  
217 movement: 1) calculating the movement plan and 2) generating the motor  
218 command. Several neurophysiology studies suggested that the movement plan is  
219 coded in visual (retinal) coordinates (Andersen & Buneo, 2002; Batista et al.  
220 1999) while motor commands are coded in joint coordinates (Crawford et al.  
221 2004). Following the same logic, in our model the two steps were performed in  
222 two different coordinates respectively: visual and proprioceptive coordinates.  
223 Visual information of hand and target positions were coded as retinal information  
224 in gaze-centered coordinates,  $X_h=(x_{1,h},x_{2,h})$  and  $X_t=(x_{1,t},x_{2,t})$  respectively (left  
225 panel in **Error! Reference source not found.** Figure 3), while the proprioceptive  
226 information of initial hand position was coded as joint angles in shoulder-centered  
227 coordinates,  $(\Theta_{1,h},\Theta_{2,h})$ , (right panel in Figure **Error! Reference source not**  
228 **found.3).**

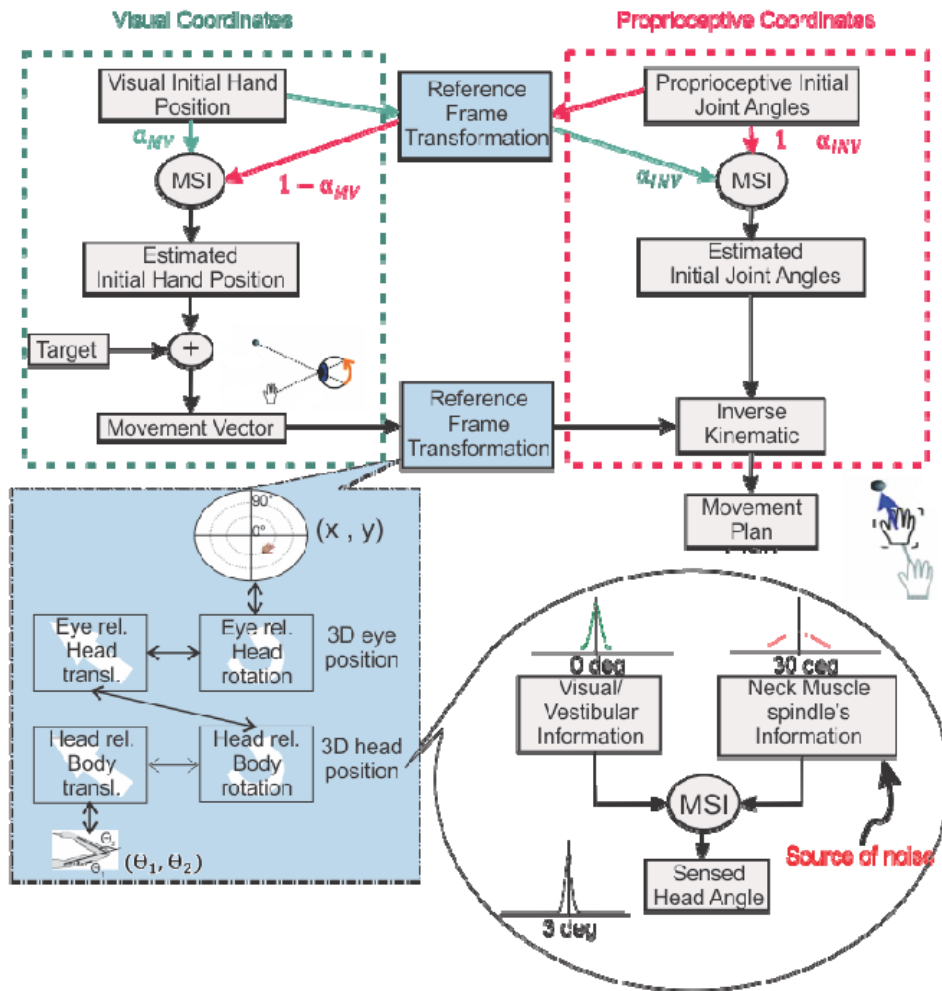

**Figure 3. Model schematic.** In order to perform the reach movement successfully, IHP is calculated in both visual and proprioceptive coordinates. In visual coordinate, IHP is computed by transforming proprioceptive information into visual coordinates. Visual and transformed proprioceptive information are weighted and combined based on Bayesian theory. A movement vector is calculated by comparing the estimated IHP and target positions. The same process takes place in proprioceptive coordinate to generate a proprioceptive IHP estimate. Using inverse kinematic, the transformed movement vector and IHP can be combined to calculate the movement plan based on the required changes in joint angles. The blue box represents the RFTs process. RFTs are performed by considering eye and head orientation as well as the translations between rotation centers of the body. The head orientation is estimated by combining visual/vestibular and neck muscle spindle information using Bayesian statistics (see Methods for details).

229

230 **Reference frame transformation** (Blue box Figure 3)

231 In order to accurately transform information between the visual and

232 proprioceptive coordinates the full body geometry must be taken into account

233 (Blohm & Crawford 2007). This is specifically important when the head is not

234 straight, i.e. rotating the head results in shifts of centers of rotation of the eye,  
235 head, and shoulder relative to each other (Henriques & Crawford, 2002;  
236 Henriques et al., 2003). To capture this, we performed a series of rotations (R)  
237 and translations (T), formulated in equations (1) and (2) respectively.

$$238 \quad X_{\text{rotated}} = R * X_{\text{original}} \quad (1)$$

239 Where  $R = \begin{bmatrix} \cos & \sin \\ -\sin & \cos \end{bmatrix}$ ,  $\theta > 0$  holds for clock wise rotations.

$$240 \quad X_{\text{translated}} = X_{\text{original}} + T \quad (2)$$

241 In the following section, we explain the required steps to transform hand position  
242 from eye-centered to shoulder-centered coordinates.

### 243 ***Retinal-to-shoulder transformation***

244 As it is depicted in Figure 3, in order to transform retinal-coded information  
245 into joint-coded information the theoretically required sequential transformations  
246 can be done by first transforming retinal to head coordinates, then from head to  
247 shoulder and finally from should to joint coordinates (Note that this is likely  
248 different from how the brain is performing this transformation):

#### 249 ***1- Retinal-to-head***

$$250 \quad X_{h,eye}^v = R_{eye} * X_{h,retinal}^v \quad (3)$$

$$251 \quad X_{h,head}^v = R_{head} * (X_{h,eye}^v + T_{eye-head}) \quad (4)$$

252 In which  $R_{eye}$  and  $R_{head}$  are rotations based on eye angle and head angle  
253 respectively and  $T_{eye-head}$  is the translation between eye and head which  
254 is the distance between the center of two eyes (eye-centered coordinate)  
255 and the joint of head and neck (head centered coordinate).  $X_{h,eye}^v$  is the  
256 visual information of hand position in eye-centered coordinate: Subscript

257 'h' represents information related to the hand position and the following  
258 subscript represents the related coordinate at that step. In addition, we  
259 deployed superscripts 'v' or 'p' to dissociate if the information is originally  
260 provided by vision or proprioception respectively. All the following  
261 parameters have the same pattern.

## 262 2- Head-to-shoulder

$$263 X_{h,shoulder}^v = X_{h,head}^v + T_{head-shoulder} \quad (5)$$

264 Since the body was upright, a translation is sufficient to perform the  
265 transformation between the shoulder and head. In our setup, the shoulder  
266 was located downward and to the right of the head.

## 267 3- Shoulder-to-joint

$$268 {}_h^{v}_{joint} = A(x^0) * X_{h,shoulder}^v \quad (6)$$

269 In which  $A(x^0)$  is the forward kinematic matrix and has the same form as  
270 equation (7) by Burn and Blohm (2010), since our experimental  
271 configuration is the same. In order to transform the information from joint  
272 angle coordinates to retinal coordinates, the same procedure can be  
273 performed only in the reverse order (since we used the same configuration  
274 as Burns and Blohm (2010), both forward and inverse kinematic matrices  
275 have the same format).

276 In addition to the full body geometry, we considered the noise of  
277 transformation in our model. Similar to Burns and Blohm (2010), we have two  
278 noise component resulted from the transformation: fixed transformation noise  
279 ( $\sigma_{fT}^2$ ) to simulate the fact that any transformation has a cost (Sober and Sabes

280 2005), and variable transformation noise ( $\sigma_{VT}^2$ ) to simulate the different head  
281 orientations and neck load conditions of our experiment (this is the same as the  
282 variability in the estimated head angle).

### 283 **Estimating head angle**

284 As mentioned in the previous section, participants performed reaching  
285 with different head roll and neck load conditions. Therefore, our model must  
286 include a head angle estimation component as a crucial part of the RFTs  
287 processes. Previous studies showed that humans combine visual, vestibular, and  
288 neck proprioceptive information for estimating head orientation, similar to a  
289 Bayesian optimal observer (Mergner et al., 1983, 1991, and 1997; Clemens et  
290 al., 2011; Alberts et al., 2016). For instance, Mergner et al. (1991) demonstrated  
291 that the stimulation of neck muscles by rotating the trunk on a fixed head caused  
292 a sensation of head rotation and also increased the uncertainty of head position  
293 estimation. In addition, two studies carried out in Medendorp's group  
294 demonstrated that the noise in both vestibular and proprioceptive information  
295 should be considered signal-dependent (Clemens et al., 2011; Alberts et al.  
296 2016). Therefore, we used a similar principle for our head angle estimation in  
297 RFTs processes. Thus, following the same rational, we included neck load in our  
298 experimental condition with the goal of investigating the contribution of the  
299 mentioned sources of information for estimating the head angle. Assuming that  
300 each source of information has a Gaussian distribution, the head angle signal  
301 has a Gaussian distribution as well and its mean and variance can be estimated  
302 as follows:



303 
$$\delta_{HA}^2 = \frac{\delta_{V/V}^2 * \delta_{NM}^2}{\delta_{V/V}^2 + \delta_{NM}^2} \quad (7)$$

304 
$$\mu_{HA} = \frac{\delta_{HA}^2}{\delta_{V/V}^2} * \mu_{V/V} + \frac{\delta_{HA}^2}{\delta_{NM}^2} * \mu_{NM} \quad (8)$$

305 In which  $\delta_{HA}^2$ ,  $\delta_{V/V}^2$ , and  $\delta_{NM}^2$  are associated variability in head angle  
306 estimation, visual/vestibular information, and neck muscle information  
307 respectively and  $\mu_{HA}$ ,  $\mu_{V/V}$ , and  $\mu_{NM}$  are the associated means in the same order.  
308 Therefore, we also were able to extract the relative visual/vestibular vs. neck  
309 muscle contribution in estimating head angle ( $C = \frac{\delta_{NM}^2}{\delta_{V/V}^2}$ ).

310 As mentioned earlier, one of the key features of our model is including  
311 signal dependent noise in our RFTs: The assumption is that when we roll the  
312 head, the variability of both vestibular and neck muscle spindle signals increase  
313 due to higher signal value. In addition, applying the neck load increases the force  
314 on the neck muscle which results in increasing the variability of neck muscle  
315 spindle signal. In the conditions of applying the neck load while the head is not  
316 straight, the two forces on the neck muscle are combined in order to drive the  
317 predicted neck muscle force. Therefore, we differentiated the variability for the  
318 head straight and no load condition from the other head roll and neck load  
319 conditions. Similar to Vingerhoets et al. (2008), we used a linear model to explain  
320 the increase in variability due to increase in the signal value:

321 
$$\delta_{V/V}^2 = \delta_{V/V,h0}^2 + head\ roll * \delta_{V/V,h\neq0}^2 \quad (9)$$

322 
$$\delta_{NM}^2 = \delta_{NM,h0}^2 + mucls\ force\ from\ (HR\ \&\ NL) * \delta_{NM,h\neq0}^2 \quad (10)$$

323 In which  $\delta_{V/V,h0}^2$  and  $\delta_{NM,h0}^2$  are visual/vestibular and neck muscle variability for  
324 head straight condition and  $\delta_{V/V,h\neq 0}^2$  and  $\delta_{NM,h\neq 0}^2$  are the ones for other  
325 experimental conditions. This will result in having  $\mu_{HA,h0}$  and  $\mu_{HA,h\neq 0}$ .

326 At the final step, the required head angle for the transformation ( $_{HA}$ ) is  
327 derived by scaling the estimated head angle ( $\mu_{HA}$ ) (obtained by sampling from  
328 the above Gaussian distribution) by a gain factor  $\beta$ :  $_{HA} = \beta * \mu_{HA}$ .

### 329 **Multisensory integration**

330 In order to estimate the initial hand position (IHP), visual (V) and  
331 proprioceptive (P) information are combined using multisensory integration  
332 principles. In our model, the multisensory integration is happening twice: once in  
333 visual coordinates (coded in Euclidean) in order to calculate the movement  
334 vector (MV) and once in proprioceptive coordinates (coded in joint angles) in  
335 order to generate the motor command using inverse kinematics (INV). We  
336 assumed that each piece of information has a Gaussian distribution (before and  
337 after RFTs) and therefore using multivariate Gaussian statistics the mean and  
338 covariance of the combined IHP estimated from vision (V) and proprioception (P)  
339 in each coordinate can be written as:

$$340 \quad \Sigma_{IHP} = (\Sigma_P^{-1} + \Sigma_V^{-1})^{-1} \quad (11)$$

$$341 \quad \mu_{IHP} = \Sigma_{IHP} \cdot \Sigma_P^{-1} * \mu_P + \Sigma_{IHP} * \Sigma_V^{-1} \cdot \mu_V \quad (12)$$

342 Where  $\Sigma_{IHP}$  is the covariance matrix of IHP and  $\Sigma_V$  and  $\Sigma_P$  are covariance  
343 matrices of visual and proprioceptive information respectively. Similarly,  $\mu_{IHP}$ ,  $\mu_P$ ,  
344 and  $\mu_V$  are the mean values (in the vector format) for IHP, visual, and

345 proprioceptive information. Therefore, the visual weight in each of the visual and  
346 proprioceptive coordinates is calculated as:

347 
$$\alpha_{MV} = \Sigma_{IHP,v} * \Sigma_{V,v}^{-1} \quad (13)$$

348 
$$\alpha_{INV} = \Sigma_{IHP,p} * \Sigma_{V,p}^{-1} \quad (14)$$

349 Where  $\alpha_{MV}$  is the multisensory integration weight for visual information in  
350 visual coordinates and  $\alpha_{INV}$  is the multisensory weight for visual information in  
351 proprioceptive coordinates. Where  $\Sigma_{IHP,v}$  is the covariance matrix of IHP in visual  
352 coordinates and  $\Sigma_{V,v}$  is the covariance matrix of visual information in visual  
353 coordinates. Similarly,  $\Sigma_{IHP,p}$  is the covariance matrix of IHP in proprioceptive  
354 coordinates and  $\Sigma_{V,p}$  is the covariance matrix of visual information in  
355 proprioceptive coordinates.

### 356 **Final motor command and movement direction**

357 After estimating the IHP, the desired movement vector is calculated by  
358 subtracting the hand position from the target position;  $\Delta x = tar - \mu_{IHP,v}$ . We used  
359 the velocity command model (Sober & Sabes 2003; Burns & Blohm 2010) to  
360 transform the desired movement vector to the required motor command:  
361  $\dot{x} = J(\theta)J^{-1}(\theta)\Delta x$  (where  $J(\theta)$  and  $J^{-1}(\theta)$  have the same form as equation (16)  
362 and (17) in Burns and Blohm 2010).

363 At the final step the movement direction is calculated by transforming the  
364 movement command from Euclidean coordinates to polar coordinates using the  
365 following equations:

366 
$$r = \sqrt{x^2 + y^2} \quad (15)$$

367 
$$\tan\varphi = \frac{y}{x} \quad (16)$$

368

### 369 **Generating quantitative model predictions**

370 In order to generate our model predictions we used a Monte Carlo  
371 approach (Binder & Heermann, 2002); we assumed that the sensory information  
372 (visual and proprioceptive information of initial hand position, visual/vestibular  
373 and proprioceptive information of head position) can be sampled from a  
374 Gaussian distribution with a specific mean and covariance matrix. Then, the RFT  
375 procedure is performed on each sample based on sampled head roll signals to  
376 obtain the distribution of the transformed signal. The movement direction was  
377 calculated for each sample and the final movement mean and variance were  
378 calculated based on this distribution. The model code is available on Github  
379 (<https://github.com/Parisaabedi/NeckMuscleLoad> ).

### 380 **Model parameters**

381 Based on average body physiology, upper arm and lower arm (including  
382 fist) lengths were set constant to  $L1 = 30$  and  $L2 = 45$  cm respectively. Shoulder  
383 location was assumed 30 cm backward from the target and 25 cm rightward of  
384 the target, the distance between eye and top of the head considered 13 cm, and  
385 the head length considered 28 cm (40 cm including the neck). IHPs and target  
386 positions were taken from the experimental data.

387 There were seven free parameters in the model, i.e. the variance of both  
388 proprioceptive ( $\sigma_p^2$ ) joint angles and visual IHP ( $\sigma_v^2$ ) - we assumed that the two  
389 dimensions in both coordinates are independent with the same variability-, the  
390 visual/vestibular vs. neck muscle spindle contribution factor (C), the variance of

391 head angle estimation for head straight ( $\sigma_{h0}^2$ ), a fixed reference frame  
392 transformation cost ( $\sigma_{fT}^2$ ), and a variable reference frame transformation cost  
393 ( $\sigma_{VT}^2$ ).

394 As it is mentioned before, the  $\sigma_{VT}^2$  is resulted from the variability in the  
395 head angle estimation;  $\delta_{HA}^2$ . By substituting  $C = \frac{\delta_{NM}^2}{\delta_{VV}^2}$  in equation (7), we were  
396 able to extract the variance of neck muscle spindles ( $\sigma_{NM}^2$ ) and visual/vestibular  
397 ( $\sigma_{V/V}^2$ ). Furthermore, we added an additional variance component to account for  
398 the added variability during performing the planned movement ( $\sigma_{MV}^2$ ).

399 In order to estimate the model parameters we used a standard maximum  
400 likelihood procedure. We calculated the negative log-likelihood of the angular  
401 reach error data to fit on the proposed model given parameter set  $\rho$  as:

$$402 \quad L_{\rho}(\mu, \sigma^2 | y) = -\left(-\frac{n}{2} \ln(2\pi) - \frac{n}{2} \ln(\sigma^2) - \frac{1}{2\sigma^2} \sum_i (y_i - \mu)^2\right) \quad (17)$$

403 Where  $(\mu, \sigma^2)$  are the mean and variance driven from the model given the  
404 parameter set  $\rho$ ,  $n$  is the number of data points and  $y_i$  is each data point from the  
405 experiment. It should be noted that  $(\mu, \sigma^2)$  are calculated separately for each of  
406 the 360 experimental conditions: 8 visual targets \* 5 IHPs \* 3 head rolls \* 3 neck  
407 loads. We then searched for the set of parameters which minimized the  $L_{\rho}$  over  
408 the parameter space using 'fmincon.m' in MATLAB 2017. Table 1 provides the  
409 fitting values for different model parameters for individual participants along with  
410 confidence interval for each parameter. We added one additional parameter  $C$ ,  
411 which indicate the contribution of neck muscle information compared to  
412 combined visual/vestibular information by dividing the first by the second.

413

## 414 **Results**

415           Previous work (Burns & Blohm, 2010; Schlicht & Schrater, 2007; Sober &  
416 Sabes 2003) suggests human behavior is affected by stochastic RFTs. Burns  
417 and Blohm (2010) showed that rolling the head will increase the variability of  
418 reach movements and argued that could be due to the signal dependent noise in  
419 the sensed head angles: rolling the head increases the amplitude of the sensed  
420 head angle and the associated variability accordingly. Here, our goal was to  
421 investigate the sources of stochasticity in RFTs and the effect of such  
422 stochasticity on human reaching movements. To this aim, we asked human  
423 participants to perform reaching movements while their head was either straight  
424 or rolled toward each shoulder and a neck load of 0 or 1.8kg was applied to the  
425 right or left side in a 3x3 design. The experimental logic was that applying head  
426 roll and neck load will vary the sensed head angle and the associated noise due  
427 to signal-dependent noise. Since RFTs are based on these sensed angles,  
428 applying head roll / neck load increases the stochasticity of RFTs which  
429 modulates the multisensory integration weights and thus resulting in more  
430 variable and potentially biased reaching movements compared to the condition  
431 where the head is straight and no load is applied.

## 432 **General Observations**

433           A total of 51840 trials were collected, with 1529 trials being excluded due  
434 to either eye movements or predictive hand trajectories. We used directional  
435 reach errors to determine how participants weighted their visual information vs.  
436 proprioceptive information. Directional reach error (in angular degrees) was

437 computed by subtracting proprioceptive (visual) hand-target direction from overall  
438 movement direction (see Methods), where 0deg means no deviation from  
439 proprioceptive (visual) hand-target direction. By introducing the shift in the visual  
440 feedback of the initial hand position, a discrepancy between visual and  
441 proprioceptive information was created and as a result, we could determine how  
442 visual and proprioceptive information was weighted and integrated based on how  
443 participants responded to this discrepancy.

444 To evaluate how humans weight visual and proprioceptive information, we  
445 compared reach errors for each hand offset condition. In order to calculate the  
446 reach errors, we can use either the visual hand-target direction (red line in

447

448

449

450

451

452 **Figure 1B)** or the actual (proprioceptive) hand-target direction (green line

453 in

454

455

456

457

458

459 **Figure 1B).** We called the first one visual reach errors and the second one

460 proprioceptive reach errors and used them for different sections of this

461 manuscript in order to show the effects more clearly. The difference in reach

462 errors among different hand offsets indicates that both visual and proprioceptive  
463 information were used during reach planning. Figure 4 displays both  
464 proprioceptive and visual reach error curves across target directions for different  
465 initial hand position conditions for head straight and no load condition.

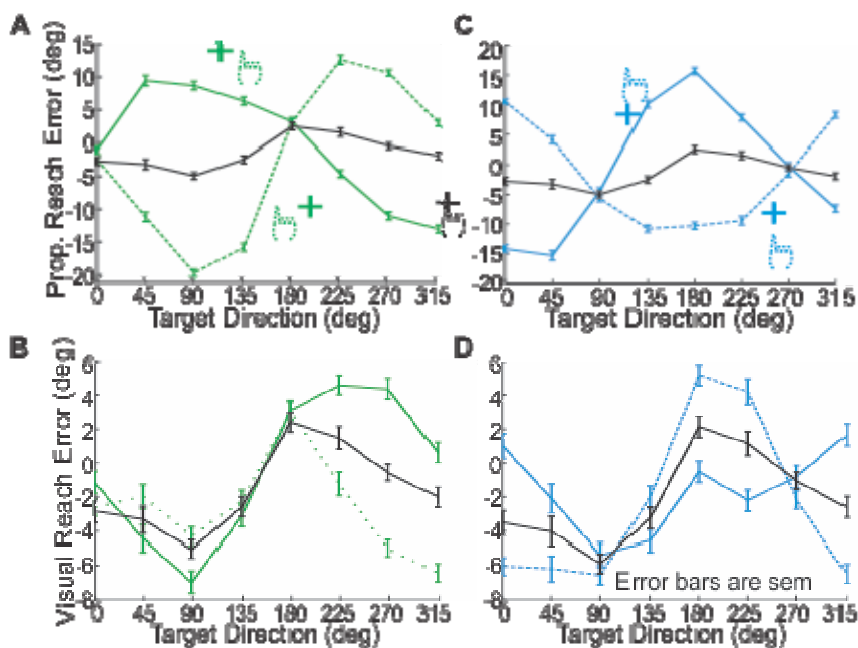

#### Figure 4. Reach error curves.

Reach errors are calculated for each target by subtracting the proprioceptive or visual hand-target direction from the performed reach movement. Solid colored lines are representing upward/rightward shifts. A,C) proprioceptive reach error curves: (A) reach errors for horizontal hand shift (green, stays the same in the rest of the manuscript) and (C) reach errors for vertical hand shift (blue, stays the same in the rest of the manuscript). B,D) visual reach error curves: (B) reach errors for horizontal shift and (D) reach errors for vertical shifts.

466 To quantify these weights, we fitted a previously proposed model (Sober &  
467 Sabes 2003) to the normalized data. The data was normalized by subtracting the  
468 0 hand offset from the other hand offsets. The model by Sober and Sabes (2003)  
469 fits our data well (Figure 5, R-squared for pooled data across all participants was  
470 equal to 0.91 and 0.93 respectively for the right and left panels) and confirms that  
471 the participants used both visual and proprioceptive information to plan their



472 reach movement. Based on this close fit of our data to the model, we can now  
 473 use this model in a first step to investigate how head roll and neck load affects  
 474 the weighting of vision and proprioceptive information about the hand.

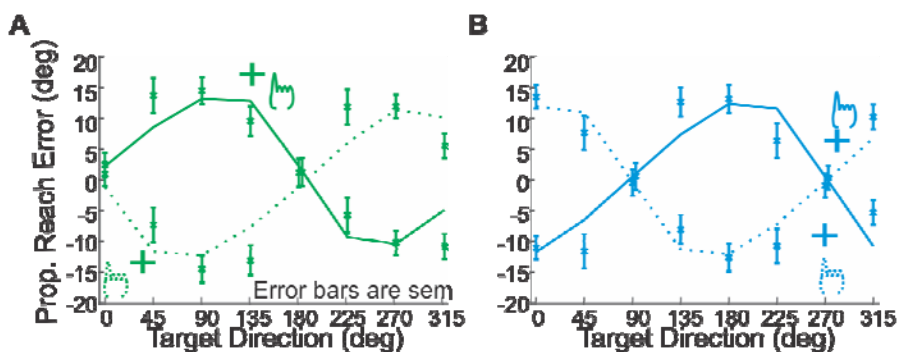

**Figure 5. Sober and Sabes 2005 model fit on the data.** The reach error curves are normalized to zero by subtracting the 0 hand offset from the other hand offsets.

475

#### 476 Head Roll effect

477 Participants performed the reach-out movements for different head roll  
 478 conditions: 30deg counter clock wise (CCW), 0deg, and 30deg clock wise (CW)  
 479 head roll. In the first step we examined if the same effect reported by Burns and  
 480 Blohm (2010) could be reproduced. As the author explained changing the head  
 481 roll had two different effects on the reach error trajectories. First, the reach error  
 482 curves shifted up/down -ward and second the variability of reach errors increased  
 483 for the tilted head conditions compared to the head upright condition.

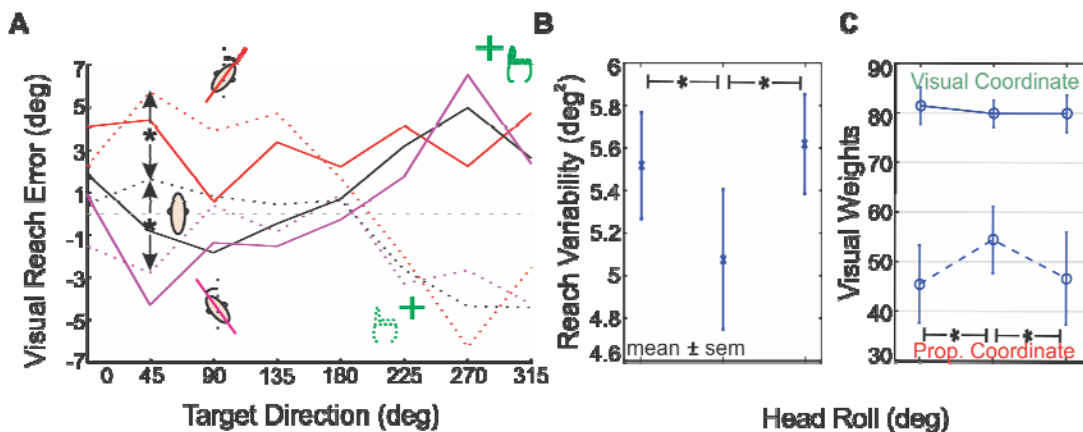

484 **Figure 6. Effect of varying head roll on reach movement behavior.** A) Reach  
485 error curves (solid line for IHP shifts to right and dotted line for IHP shifts to left) shifted upward for CW head  
486 roll and downward for CCW head roll compared to the head upright condition (n-way ANOVA,  $F(2,98) =$   
487  $11.85$ ,  $p < 0.01$ ). B) The movement variability increased significantly for rolled head conditions compared to  
488 the head upright condition (paired t-test,  $p < 0.01$ ). C) Visual weights derived by fitting the Sober and Sabes  
489 (2003) model on the data. We didn't find any significant change in visual weights in visual coordinate for  
490 different head roll conditions, while the visual weights significantly decreased in proprioceptive coordinates.  
491 Significance was tested using paired t-test ( $P < 0.05$  is considered as a significant difference).

492 Figure 6 depicts the effect of changing HR on both reach errors and  
493 movement variability. As it can be seen, there are both a bias effect and an  
494 increased variability effect for altering the head orientation compared to head  
495 straight. The n-way ANOVA with factors HR, target directions, and participants  
496 showed a significant main effect for altering head orientation,  $F(2,98) = 11.85$ ,  $p$   
497  $< 0.01$ ; and significant interaction between reaching to different targets and  
498 different HR conditions,  $F(14,98) = 5.59$ ,  $p < 0.01$ ; which shows that the effect of  
499 altering HR is different for different target directions. Bonferroni-corrected post-  
500 hoc analyses indicated that the bias effect was significant among all the HR  
501 conditions. Regarding movement variability, we performed a paired t-test across  
502 all participants for each HR condition vs. no HR condition: The increase in  
503 standard deviation due to the rolled head is significant for both sides, HR =  
504 30deg CW vs. HR = 0:  $t(8) = -3.6133$ ,  $p < 0.01$ ; HR = 30deg CCW vs. HR = 0:  
505  $t(8) = -5.6011$ ,  $p < 0.01$ . These results are consistent with the results reported by  
506 Burns and Blohm (2010).

507 We also used the Sober and Sabes (2003) model to extract the weights  
508 for different conditions. There, the visual and proprioceptive weights were the two  
509 free parameters of the model (Sober & Sabes, 2003) which is used to estimate  
510 the hand position, by integrating visual and proprioceptive information, in two  
511 different stages: visual weight in the movement planning stage and

512 proprioceptive weight in the motor command generating stage. Therefore, the  
513 weights can be extracted after fitting the model on the data. As it is depicted in  
514 Figure 6, the visual weights in visual coordinates did not change very much by  
515 varying head roll, however, the visual weight in proprioceptive coordinate  
516 decreased for rolled head conditions. This is consistent with our hypothesis that  
517 higher noise in RFTs results in lower reliability of transformed signals which leads  
518 to higher weights for proprioceptive information in the proprioceptive coordinates  
519 compared to the head straight condition.

520

#### 521 **Neck Load effect**

522 In addition to altering the head roll a neck load (rightward, no load, or  
523 leftward) was applied. We assumed that if the neck load was not taken into  
524 account, there should be no difference in the reach errors between the neck load  
525 conditions and no load condition. Alternatively, if the neck load was taken into  
526 account in estimating head roll, then we expected to observe similar effects as  
527 during head roll; up/down -ward shifts in reach error curves and increased  
528 movement variability. This is because loading the neck while the head is upright  
529 would create a discrepancy between the neck muscle spindle information and the  
530 combined visual/proprioceptive information. In addition, due to signal dependent  
531 noise, the neck muscle information should become less reliable when the neck is  
532 loaded compared to the no load condition. Consequently, the sensed head angle  
533 estimated by integrating neck muscle and visual/vestibular signal should be

534 biased toward the neck load and have more variability resulting in biased and  
535 more variable movements.

536 As it can be seen in Figure 7(A), applying the neck load created an  
537 up/down -ward shift of the reach movement error curves. An n-way ANOVA with  
538 factors NL, target location, and participants revealed a significant main effect for  
539 different NL,  $F(2,98) = 6.12$ ,  $p < 0.01$ . Bonferroni-corrected post-hoc analyses  
540 indicated that the bias effect was significant among all the NL conditions. The  
541 interaction between targets and different NL was not significant,  $F(14,98) = 1.06$ ,  
542  $p = 0.402$ , which means that the effect of varying NL on reach movement was  
543 independent of different target directions.

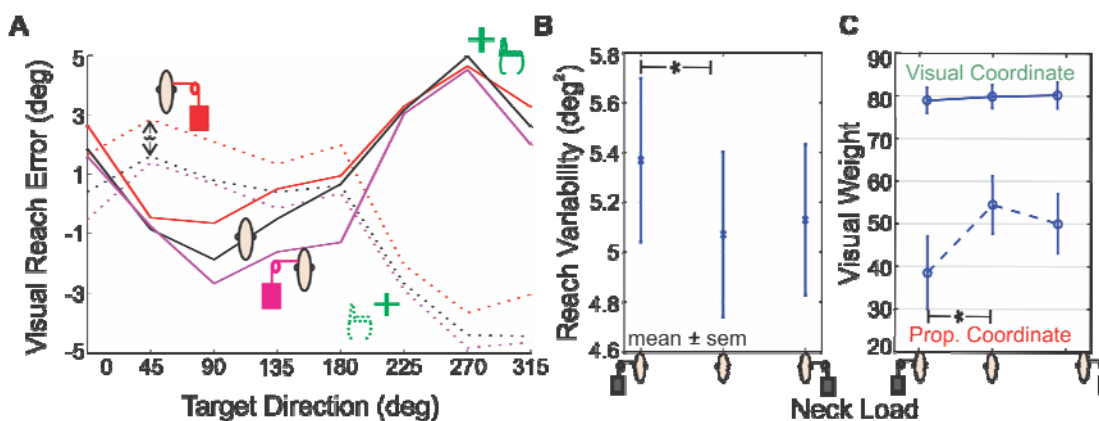

**Figure 7. Effect of applying neck load on reach movement behavior.** A) Reach error curves (solid line for IHP shifts to right and dotted line for IHP shifts to left) are shifted upward for applying neck load on the right (n-way ANOVA,  $F(2,98) = 6.12$ ,  $p < 0.01$ ). The shift in reach error curves for applying neck load on left is not statistically significant. B) The movement variability is increased significantly for applying the load on the left compared to the no load condition (paired t-test,  $t(8) = 2.7552$ ,  $p = 0.0283$ ). C) The visual weights derived by fitting the Sober and Sabes (2003) model on the data. We only observed a significant change in visual weight in proprioceptive coordinate due to applying neck load on the left side. Significance was tested using paired t-test ( $P < 0.05$  is considered as a significant difference).

544 Figure 7(B) represents the variability of reach errors in the no load  
545 condition vs. neck loaded conditions. As the figure demonstrates, the variability  
546 of reach errors is higher for applying the load compared to no load condition. We  
547 performed paired t-tests between all three different conditions across all eight

548 participants. Movement variability was significantly higher for applying the load  
549 on the left side compared to no load condition  $t(8) = 2.7552$ ,  $p = 0.0283$ . The  
550 paired t-tests revealed no significance difference among other conditions.

551

## 552 Comparison

553 So far, we showed that there are both biases and increased movement  
554 variability effects for either applying NL or HR. In the next step, we compared the  
555 variability of reach movements in the NL conditions vs. HR conditions. Based on  
556 stochasticity in RFTs we expected to have higher variability for higher amplitudes  
557 of head angle during different experimental conditions. For example, we  
558 predicted to have higher movement variability for applying only HR compare to  
559 applying only NL or have the highest variability for conditions in which both HR  
560 and NL are applied in the same direction.

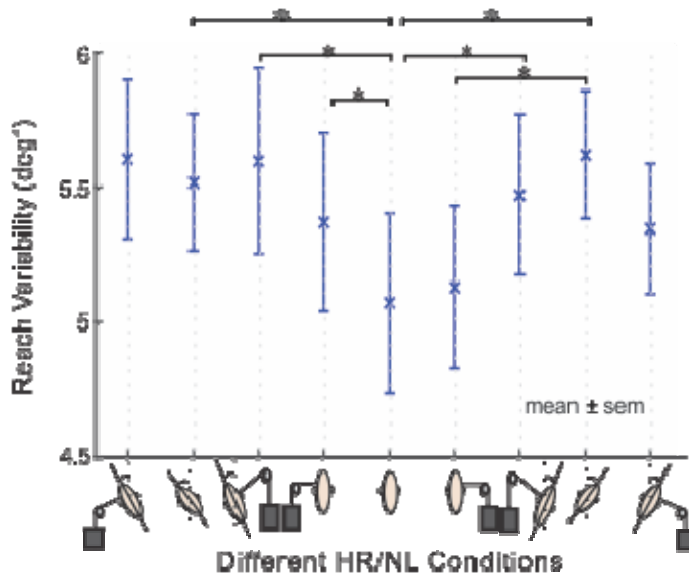

**Figure 8. Effect of different experimental conditions on reaching movement variability.** Head upright and no load condition (considered as the control condition) and the combined HR/NL conditions are sorted based on the expected increase in the variability based on the signal-dependent noise hypothesis right and left of the control condition. Rolling the head consistently increased the variability compared to the control condition. Significance was tested using paired t-test ( $P < 0.05$  is considered as a significant difference).

561 Based on Figure 8 the variability in HR conditions is higher than in NL  
562 conditions. We first ran paired t-tests between each condition separately and the

563 significant statistical differences are shown in the Figure 8. Applying the load on  
564 the left side increased the variability compared to the control condition. Then, we  
565 performed paired t-test between combined similar conditions: for example both  
566 head upright and neck load on either side are combined and created the overall  
567 NL condition. The paired t-test between HR condition and NL condition showed a  
568 significant difference,  $t(8) = 2.7444$ ,  $p = 0.0287$ ; the difference between HR  
569 condition and control condition was significant as well,  $t(8) = 2.7444$ ,  $p = 0.0020$  ;  
570 however the difference between the control and NL conditions was not  
571 significant. Together all of the above observations provide evidence for the  
572 existence of signal dependent noise in the head angle estimation and  
573 consequently the RFTs processes. However, it is not clear how such stochastic  
574 RFTs affect the reaching movement. First, contrary to the initial hypothesis no  
575 modulation of variability was observed by varying NL while the head was rolled  
576 CW/CCW. In addition, in all the conditions we observed larger effects when  
577 rolling the head on reach errors for targets away from body (45-135 degree)  
578 compared to the targets toward the body (215-315 degree). Both previous  
579 models (Sober & Sabes 2003 and Burns & Blohm 2010) fail to explain the  
580 previously mentioned effects. Based on both previous models, there shouldn't  
581 be any difference in biases effect due to head roll condition and they predict a  
582 constant up/down -ward shift in the reaching error curves. We propose that  
583 these effects can be explained by a Bayesian framework which performs  
584 geometrically accurate RFTs.  
585

586

## 587 **Modeling the stochastic reference frame transformations**

588         The above analyses demonstrate that RFTs should be considered as  
589 stochastic process. Therefore, to understand the effect of such stochastic RFTs  
590 on reach planning we developed a Bayesian model of multi-sensory integration  
591 for reach planning and explicitly included the RFTs.

592         **Error! Reference source not found.** Figure 3 depicts the schematic of  
593 our proposed model. The working principles of our model are similar to previous  
594 ones (Sober & Sabes, 2003; Burns & Blohm, 2010) with the addition of an explicit  
595 head orientation estimator (Figure 9, blue box). In summary, our model  
596 calculates the required reach movement through first calculating the movement  
597 vector in visual coordinates, by comparing estimated initial hand position and  
598 target position, and then generates the movement commands by transforming  
599 the movement vector from visual coordinates to proprioceptive coordinates.

600         We added several crucial features to the proposed model compared to the  
601 previous models (Sober & Sabes 2003, 2005; Burns & Blohm 2010). First, we  
602 explicitly included the RFTs. The RFTs processes transforms information  
603 between different coordinates considering the full body geometry; head  
604 orientation, eye orientation, head-eye translation, and head-shoulder translation.  
605 In addition, to perform the required transformations, we included a head angle  
606 estimator. The head angle estimator combines muscle spindle information and  
607 visual/vestibular information in a statistically optimal manner. Similar to Burns  
608 and Blohm (2010), we modeled both mean behavior and the associated

609 variability for each source of information; vision, proprioceptive, vestibular, and  
610 muscle spindles. To examine the effect of noisy transformations on the  
611 visual/proprioceptive information, we deployed Monte Carlo simulations. This  
612 method gave us the opportunity to explicitly study the effect of RFTs on the  
613 covariance matrices and consequently the MSI weights.

614

### 615 **Model fit**

616 In the following section we first provide the fitting results for a sample  
617 participant (#6) and then evaluate the fitting results across all nine participants.  
618 Figure 9 provides the fitting vs. data for participant # 6. Figure 9 (A and B)  
619 depicts model fitting for all different initial hand positions for different head rolls  
620 while no neck load was applied. As it can be seen, our model is able to  
621 accurately capture the reach errors for different IHP and HR conditions. Figure  
622 9C provides the model prediction for changes in variance for different conditions.  
623 Error bars were derived using bootstrapping with  $N=1000$ . Since the results for  
624 horizontal and vertical hand shifts are very similar, for all the other conditions we  
625 only provided the results for the horizontal initial hand shifts. Figure 9D-F depicts  
626 the fitting for varying the NL for different Head angles;  $0^\circ$ ,  $\pm 30^\circ$ .



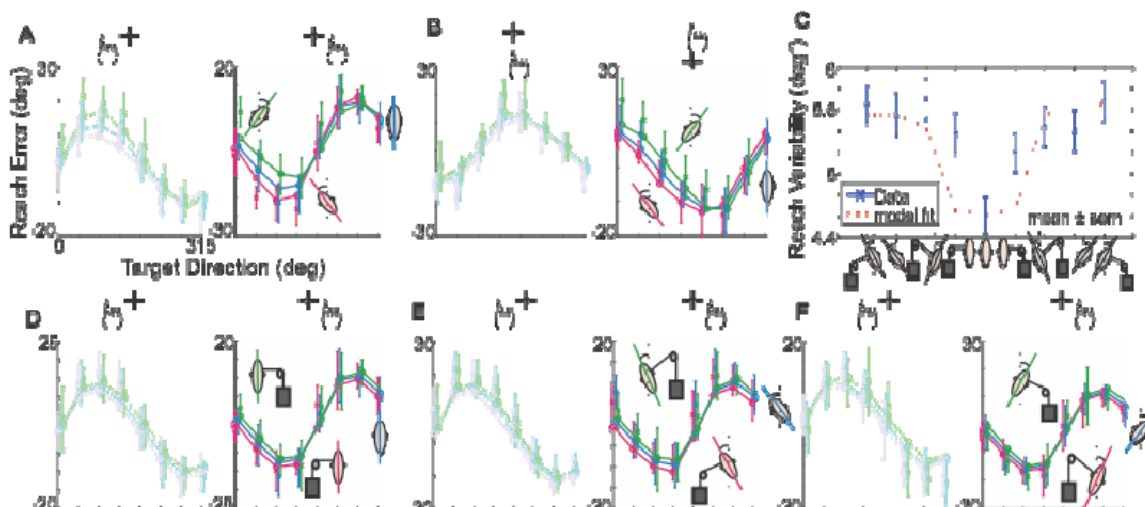

627

628

629

630

631

632

633

634

**Figure 9. Model fit for a sample participant (#6).** Model fit on the reach error curves for different IHPs and HR/NL conditions. A-B) model fit on the reach error curves for varying head orientation without applying neck load: A) solid line represents results for IHP shifts to the right and dotted line represents results for IHP shifts to the left, B) solid line represents results for IHP shifts to the up and dotted line represents results for IHP shifts to the down. C) model fit on the changes in movement variability due to varying HR and NL conditions. D-F) Model fit on reach errors for varying NL for different HR conditions. Only data for horizontal shifts are presented. The results for vertical hand shifts are similar.

635

636

637

638

639

640

641

642

After demonstrating that our model was capable of predicting the reach error behavior for a single participant, Table 1 summarizes the fitting results for all the participants. The most interesting finding here is the relatively higher contribution of visual/vestibular signal compared to neck muscle spindle ( $C \approx 26$ ). This is was consistent across all the subjects. We also observed very high movement variability across our participants.

**Table 1. Model parameter fits**

| Participants | (rad <sup>2</sup> )           | (mm <sup>2</sup> ) | (mm <sup>2</sup> ) | (deg <sup>2</sup> )           | (deg <sup>2</sup> )  | (deg <sup>2</sup> ) | C              | (mm <sup>2</sup> ) |
|--------------|-------------------------------|--------------------|--------------------|-------------------------------|----------------------|---------------------|----------------|--------------------|
| S1           | $4.69 \cdot 10^{-4}$          | 13.50              | 56.68              | $3.04 \cdot 10^{-2}$          | $7.89 \cdot 10^{-1}$ | 5.66                | 25.92          | 100.87             |
| S2           | $4.86 \cdot 10^{-4}$          | 21.59              | 56.10              | $1.49 \cdot 10^{-1}$          | 3.87                 | 5.61                | 25.76          | 48.53              |
| S3           | $4.86 \cdot 10^{-4}$          | 16.50              | 56.72              | $1.54 \cdot 10^{-1}$          | 4.00                 | 5.79                | 26.00          | 49.00              |
| S4           | $3.11 \cdot 10^{-4}$          | 9.01               | 32.71              | $2.36 \cdot 10^{-1}$          | 5.92                 | 4.97                | 25.13          | 11.56              |
| S5           | $2.45 \cdot 10^{-4}$          | 15.00              | 26.86              | $1.08 \cdot 10^{-1}$          | 2.81                 | 5.00                | 25.98          | 95.75              |
| S6           | $4.81 \cdot 10^{-4}$          | 15.03              | 38.78              | $1.23 \cdot 10^{-1}$          | 3.20                 | 5.77                | 26.00          | 37.97              |
| S7           | $4.84 \cdot 10^{-4}$          | 20.97              | 38.81              | $3.07 \cdot 10^{-1}$          | 7.97                 | 5.80                | 25.91          | 26.99              |
| S8           | $2.87 \cdot 10^{-4}$          | 16.09              | 38.44              | $1.18 \cdot 10^{-1}$          | 3.08                 | 5.80                | 26.00          | 41.32              |
| S9           | $3.20 \cdot 10^{-4}$          | 18.99              | 38.58              | $2.97 \cdot 10^{-1}$          | 7.68                 | 5.74                | 25.89          | 26.98              |
| 95% CI       | [3.13, $4.80 \cdot 10^{-4}$ ] | [13.12, 19.47]     | [33.57, 51.69]     | [0.94, $2.44 \cdot 10^{-1}$ ] | [2.44, 6.30]         | [5.30, 5.85]        | [25.61, 26.07] | [23.93, 73.62]     |

643

644 Figure 10 provides the model prediction vs. data for both reach errors and  
645 variances for different experimental conditions. Different participants are  
646 differentiated by different colors. We used several different analyses to evaluate  
647 the goodness of our model fit. First, we calculated r-squared value for each  
648 individual participants and the pool of all the participants: [54, 61, 56, 75, 50, 60,  
649 66, 71, 71, and 94] for S1-S9 and the pool of data respectively. Secondly, since  
650 the variance data was very noisy, we grouped them in bins and calculated the  
651 confidence interval for each predicted variance using the following equation (J. S.  
652 Williams, 1962):

$$653 \quad \frac{(n-1).s^2}{\chi^2_{\alpha/2}} \leq \sigma^2 \leq \frac{(n-1).s^2}{\chi^2_{1-\alpha/2}} \quad (18)$$

654 In which  $\sigma^2$  is the population variance,  $s^2$  is the sample variance,  $n$  is the  
655 sample size, and  $\chi^2_{\alpha/2}$  is chi-square distribution. Since we wanted to find the 95%  
656 confidence interval, we set  $\alpha = 0.05$ . The boxed colored area in Figure 11(B, C)  
657 is the calculated confidence interval for the variances. Based on this analysis, we  
658 could see that our model provides a decent fit on the data.

659 Finally, we examined if our residual has a random pattern by examining  
660 the normality of our model residual using normal probability plot, plotted using  
661 MATLAB 2016 'normplot.m'. Figure 11 provides the normal probability plot of our  
662 fitting for all nine participants. As it is depicted, residual values for all the  
663 participants approximately have a normal distribution which implicates that our  
664 model captures all the features in the data. More details of how our model  
665 explains the data can be found in supplementary materials.

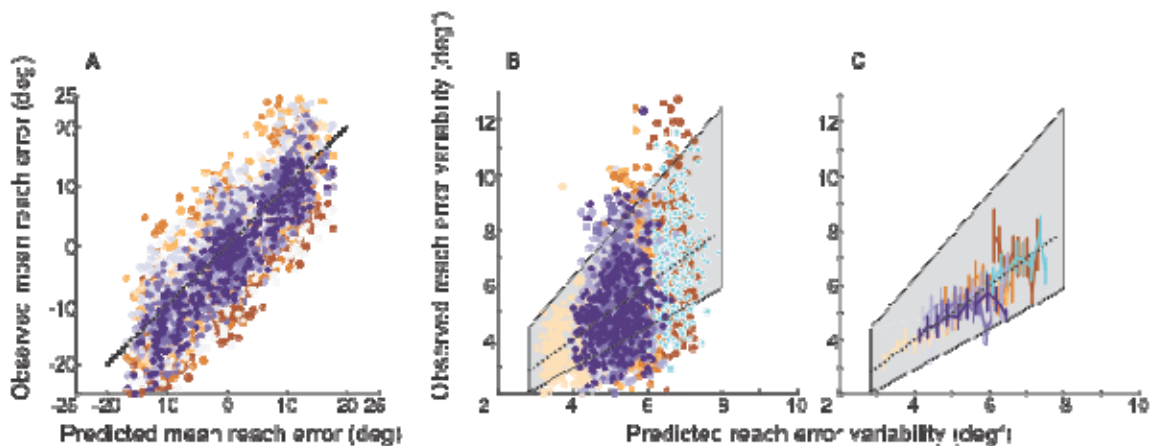

666

667 **Figure 10. Model prediction vs. observed data for each individual**  
668 **participant.** Data for each individual participant was fitted to our model. Each color represents an  
669 individual participant. A) The model prediction vs. observed data for reach errors. B) The model prediction  
670 vs. observed data for reach variability. C) Same data as in section B grouped into bins of 0.25 deg<sup>2</sup> (mean  
671 and standard error). The gray box represents the confidence interval for predicted variances based on our  
672 model.

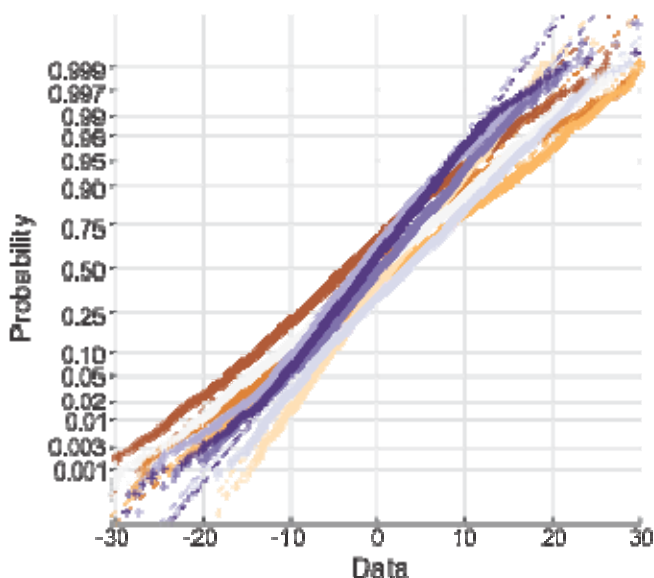

**Figure 11. Residual analysis: normal probability plot.** The probability plot is depicted for each participant, different colors. As it can be seen the residuals of our model fit compared to the participants' data has almost a normal distribution for all the participants.

673

## 674 Discussion

675 We assessed the effect of neck muscle spindle noise on multi-sensory  
676 integration during a reaching task and found that applying neck load biased head  
677 angle estimation across all head roll angles resulting in systematic shifts in reach  
678 errors. We also examined the effect of head roll on reach errors and observed

679 both an increase in movement variability and biases in reaching errors; similar to  
680 Burns & Blohm (2010). To quantitatively examine the effect of noise on reaching  
681 movements, we developed a novel 3D stochastic model of multisensory  
682 integration across reference frames. The effect of neck muscle spindle noise and  
683 head roll could be explained by a misestimation of head orientation and signal-  
684 dependent noise in the RFTs between visual and proprioceptive coordinates. The  
685 model was able to successfully reproduce the reaching patterns observed in the  
686 data providing evidence that the brain has online knowledge of full body  
687 geometry as well as the reliability associated with each signal and uses this  
688 information to plan the reach movement in a statistically optimal manner.

689

#### 690 **Model discussion**

691 In our model, the multisensory integration process occurs in specific  
692 reference frames; i.e. in visual and proprioceptive coordinates. Therefore, signals  
693 should be transformed into the appropriate coordinate frame before integration  
694 which is done by a series of coordinate rotations and translations. However, we  
695 do not claim that the brain performs these computations in the same explicit  
696 serial way. Alternatively, neurons could directly combine different signals across  
697 reference frames (Abedi Khoozani et al., 2016; Blohm et al., 2009; Ma et al.  
698 2006; Beck et al., 2011), e.g. by gain modulation mechanisms. Regardless of the  
699 mechanism used, we expect very similar behavioral outcomes.

700 In addition, we assumed that all the distributions remain Gaussian after  
701 performing RFT processes to simplify the required Bayesian computations.

702 However, in general, this is not necessarily correct. For example, it has been  
703 shown that noisy transformations can dramatically change the distribution of  
704 transformed signals (Alikhanian et al., 2015). Since the noise in our RFTs was  
705 small enough, the deviations from a Gaussian distribution are negligible and this  
706 approximation did not affect our model behavior dramatically. It would be  
707 interesting, though, to examine how considering the actual distribution and  
708 performing the basic Bayesian statistics (Press, 1989) will change the model  
709 behavior.

710

### 711 **Interpretation of observations**

712 We suggest that neck load biased head angle estimation across all head  
713 roll angles, which resulted in systematic biases in reach error curves. Our model  
714 accounted for these shifts by assuming that neck load biases the head angle  
715 estimation toward the direction of the load. How our brain estimates the head  
716 orientation has previously been investigated. The vestibular system and  
717 especially otolith system is very important for estimating the static head  
718 orientation relative to gravitational axes (Fernandez et al., 1972; Sadeghi et al.,  
719 2007). Vingerhoets et al. (2009) demonstrated that tilted visual and vestibular  
720 cues bias the perception of visual verticality. The author showed that a Bayesian  
721 model that integrates visual and vestibular cues can capture the observed biases  
722 in verticality perception. Furthermore, muscle spindles play an important role in  
723 determining joint position sense (Goodwin et al., 1972; Scott & Loeb, 1994)  
724 compared to the other sources; e.g. tendons or cutaneous receptors (Gandevia

725 et al., 1992 and Jones, 1994). Armstrong et al. (2008) showed that the muscles  
726 in the cervical section of the spine have a high density of muscle spindles  
727 providing an accurate representation of head position relative to the body.  
728 Therefore, head angle can be estimated from a combination of visual, vestibular  
729 and neck muscle spindle information.

730 We included multisensory integration of visual/vestibular, and neck muscle  
731 spindle signals in our model. Since we only modulated neck muscle information,  
732 we assumed that a combination of visual/vestibular signals is integrated with  
733 neck muscle spindle information. We were able to retrieve the relative  
734 contribution of visual/vestibular information vs. neck muscle spindle information  
735 by fitting our model to the data. We found that the contribution of neck muscle  
736 spindle information was very low (in the order of 5%) compared to  
737 visual/vestibular information.

738 There could be several possible explanations for observing a relatively low  
739 contribution of the neck muscle information. First, we selected the amount of the  
740 neck load in a way to apply force comparable to 30deg head tilt. However, due to  
741 the complex organization of neck muscles (Armstrong et al., 2008) we couldn't  
742 directly measure the changes in muscles' activity. Therefore, to accurately  
743 measure the effect of applying load on neck muscle spindle information, a  
744 detailed model of neck muscle organization would be required. Moreover, usually  
745 neck muscle information agrees with the skin receptor (i.e. Cutaneous receptor)  
746 information. In our task, however, the neck muscle information and Cutaneous

747 receptor information are in conflict, which might be a potential reason for down-  
748 weighting neck proprioceptive information (Körding et al. 2007).

749         Unexpectedly, we observed that applying head roll creates larger reaching  
750 movement biases for visual targets away from the body compared to visual  
751 targets toward the body. This pattern can be captured by including the full body  
752 geometry in the RFT processes in our model. Previously, Blohm and Crawford  
753 (2007) showed that in order to accurately plan a reaching movement to visual  
754 targets, the full body geometry (both rotations and translations) has to be taken  
755 into account by the brain. Based on our model, the displacement of centers of  
756 rotation between head- and eye-centered coordinate spaces caused this  
757 asymmetry in the reaching movements.

758         In addition to biases, we observed that reaching movements were more  
759 variable in the straight head with neck load conditions compared to the straight  
760 head and no load condition. We considered this as evidence for neck load  
761 affecting RFTs; we assumed that the neck muscle spindles have signal-  
762 dependent noise (Scott & Loeb, 1994). Therefore, applying the neck load  
763 increases the noise in the neck muscle spindle information and consequently the  
764 sensed head orientation. This noisier sensed head angle resulted in noisier RFTs  
765 and accordingly more variable reach movements.

766         Surprisingly, we observed an asymmetry in the amount of variability  
767 increase by applying neck load on the right vs. left side when the head was  
768 upright. One explanation could be that since all participants were right-handed,  
769 they were more sensitive to the changes on the left side. Several imaging studies

770 demonstrated that right-handed people have bigger left hemispheres with more  
771 neural resources associated to the right-side of the body (Bauermeister, 1987;  
772 Linkenauger et al., 2009; Linkenauger et al., 2012). Bauermeister (1987) tested  
773 the effect of handedness on perceiving verticality and showed that right-handed  
774 participants are more responsive to the right sided stimulus than to the left sided  
775 stimulus.

776         Since head roll with no neck load caused higher increase in movement  
777 variability compared to applying neck load while the head was upright, we  
778 expected to see a systematic modulation of movement variability by applying  
779 neck load while the head was tilted. Specifically, we expected to observe the  
780 highest amount of movement variability when the neck load and head roll were  
781 applied on the same side; e.g. 30deg CW head roll and right side neck load. The  
782 logic is that when both head roll and neck load are applied in the same direction,  
783 the neck muscle signal indicates the highest angle and due to signal dependent  
784 noise the associated variability of head angle estimations has the highest value.  
785 However, applying the load on the same side as the tilted head did not increase  
786 the movement variability significantly compared to only tilting the head.

787         A possible explanation for the lower effect of applying load on the same  
788 side of titled head can be relatively low contribution of neck muscle spindle  
789 information vs. visual/vestibular information during head angle estimation,  
790 provided by our model. The remarkable observation is that even though the  
791 contribution of neck muscle information is low, applying neck load still has a  
792 tangible effect on reaching movements for all head roll conditions, observed both



793 in our data and model predictions. Another explanation is that the brain might not  
794 integrate the visual/vestibular information in this condition due to the big  
795 discrepancy between neck muscle information and visual/vestibular information  
796 (due to lack of causality; Kording et al. 2007). In our experimental design we  
797 selected the neck load value to simulate the same force as when the head is  
798 tilted 30deg ( $\text{head weight} \cdot \sin(60\text{deg}) = 0.5 \cdot \text{head weight}$ ). Consequently, when  
799 the head is tilted 30deg CW and the load is applied on the right side the total  
800 force on the neck muscle can be calculated as:  $0.5 \cdot \text{head weight (head tilt)} + 0.5 \cdot \text{head weight (head load)} = \text{full head weight}$ ; this force is stimulating the  
801 neck muscle as if the head was tilted 90deg, which is very unlikely. Therefore,  
802 the brain might ignore the neck muscle spindle information fully.  
803

804 We interpreted the observed increase in movement variability as an  
805 indication of signal dependent noise in the RFT process. However, an alternative  
806 hypothesis to the signal dependent noise is uncommon posture (Körding &  
807 Sabes 2011). According to the uncommon posture hypothesis, we might have  
808 more neuronal resources allocated to the head straight posture since we perform  
809 most of our movements with the head straight. As a result, rolling the head  
810 creates higher uncertainty due to uncommon posture independent of signal  
811 dependent noise. Even though this argument might be valid for head roll, it  
812 cannot explain the increased movement variability due to applying neck load. In  
813 other words, applying neck load while the body posture was kept unchanged still  
814 increased the movement variability which is in contrary to the uncommon posture  
815 hypothesis.

816 We observed that changing head roll and/or applying neck load modulated  
817 multisensory weights in both visual and proprioceptual coordinates. We validated  
818 this finding by both fitting Sober and Sabes' (2003) model and our new full  
819 Bayesian RFTs model to the data. We found that increasing the noise in the  
820 sensed head angle estimation decreased the reliability of transformed signals,  
821 which we hypothesized is the result of the stochastic RFTs, and consequently  
822 lowered weights for transformed signals in the multisensory integration process.  
823 Therefore, we conclude that both body geometry and signal-dependent noise  
824 influence multi-sensory integration weights through stochastic RFTs.

825 We demonstrated that head position estimation plays a vital role in RFT  
826 processes required for reach movements. Previous studies showed that non-  
827 visual information of head position in space, i.e. from the neck muscle spindles  
828 (Proske & Gandevia, 2012) and from the vestibular system (Angelaki & Cullen  
829 2008; Cullen 2012), decline over time providing better information about the  
830 relative changes in head position than about the absolute position. This behavior  
831 is explained based on proprioceptive drift; afferent discharges decline over time  
832 (Tsay et al., 2014) resulting in imprecise absolute estimation of the head position.  
833 We evaluated the temporal evolution of head angle estimation and its possible  
834 effect on reaching movements by dividing each block of our experiment into 4  
835 bins (data not shown); however we found no changes in movement biases or  
836 variability. Therefore, we believe that our experiment design and timing was not  
837 appropriate to investigate changes of head angle estimation over time on

838 reaching behaviour. This question, however, is an intriguing question and should  
839 be investigated in future experiments.

840

## 841 **Implications**

842 Our findings have implications for behavioral, perceptual,  
843 electrophysiology, and modeling studies. First, we have demonstrated that both  
844 body geometry and stochasticity in RFTs modulate multisensory integration  
845 weights. It is possible that other contextual variables such as attention or prior  
846 knowledge also modulate multisensory weights and will subsequently affect both  
847 perception and action. In addition, we have shown that such modulations in  
848 multisensory weights can create asymmetrical biases in reach movements. Such  
849 unexpected biases may be prevalent in behavioral data obtained during  
850 visuomotor experiments in which participants perform the task in a robotic setup  
851 while their body is in various geometries, e.g. tilted head forward or elevated  
852 elbow. Therefore, it is important to consider that forcing specific body  
853 configurations can create unpredicted effects that are important for interpreting  
854 the behavioral data.

855 Our findings also suggest that the brain must have online knowledge of  
856 the statistical properties of the signals involved in multisensory integration. This  
857 could be achieved by population codes in the brain (Ma et al., 2009), which  
858 agrees with the current dominant view that the brain performs the required  
859 computations through probabilistic inferences (Pitkow & Angelaki, 2017).  
860 Alternatively, multisensory weights and the change of weights with contextual

861 parameters could be learned (Mikula et al., 2018). Learned weights could be  
862 specially advantageous when it is difficult to estimate sensory reliability.  
863 Computational models that include required latent variables are crucial to  
864 understand the required computations. An important benefit of such models is  
865 that they can be used to generate training sets for neural networks in order to  
866 investigate potential neural mechanisms underlying probabilistic inference. Such  
867 studies will motivate appropriate electrophysiology experiments to validate/refute  
868 predications of related models.  
869

870 **References**

- 871 **Abedi Khoozani, P., Standage, D., and Blohm, G.**, An approximate  
872 normalization model for multisensory integration across reference frames, in the  
873 Annual meeting of Society for Neuroscience, San Diego, 2016.  
874
- 875 **Alikhanian, H., Carvalho, S., and Blohm, G.**, Quantifying effects of stochasticity  
876 in reference frame transformations on posterior distributions, *Frontiers in*  
877 *Computational Neuroscience*, 2015.  
878
- 879 **Andersen, R., and Buneo, C.**, Intentional maps in posterior parietal cortex.  
880 *Annual Review of Neuroscience*, 25(1), 189, 2002.  
881
- 882 **Angelaki, D. E., & Cullen, K. E.**, Vestibular System: The Many Facets of a  
883 Multimodal Sense. *Annual Review of Neuroscience*, 31(1), 125–150, 2008.  
884 <https://doi.org/10.1146/annurev.neuro.31.060407.125555>
- 885 **Armstrong, B., McNair, P., and Williams, M.**, Head and neck position sense.  
886 *Sports Med.* 38, 101–117, 2008.
- 887 **Atkins, J. E., Fiser, J., and Jacobs, R. A.** Experience-dependent visual cue  
888 integration based on consistencies between visual and haptic precepts. *Vision*  
889 *Res.* 41, 449–461, 2001.  
890
- 891 **Batista, A. P., Buneo, C. A., Snyder, L. H., & Andersen, R. A.**, Reach plans in  
892 eye-centered coordinates. *Science*, 285, 257–260, 1999.  
893
- 894 **Bauermeister, M.** Effect of body tilt on apparent verticality, apparent body  
895 position, and their relation. *Journal of Experimental Psychology*, 1964,67, 142-  
896 147.  
897
- 898 **Beck, J. M., Latham, P. E., and Pouget A.**, Marginalization in neural circuits  
899 with divisive normalization. *J Neuroscience*, 31, 15310-9, 2011.  
900
- 901 **Binder, K. and Heermann, D.W.**, *Monte Carlo Simulation in Statistical Physics.*  
902 *An Introduction (4th edition)*. Springer, 2002.  
903
- 904 **Blohm, G., Keith, G. P., and Crawford, J. D.**, Decoding the cortical  
905 transformations for visually guided reaching in 3D space. *Cerebral Cortex*, 19(6),  
906 1372-1393, 2009.  
907
- 908 **Blohm, G. & Crawford, J.D.**, Computations for geometrically accurate visually  
909 guided reaching in 3-D space. *Journal of Vision.* 7, 1–22, 2007.  
910
- 911 **Buneo, C. A., Jarvis, M. R., Batista, A. P., and Andersen, R. A.**, Direct vis-  
912 uomotor transformations for reaching. *Nature* 416, 632–636, 2002.

- 913  
914 **Burns, J. K., and Blohm, G.**, Multi-sensory weights depend on contextual noise  
915 in reference frame transformations. *Frontiers in Human Neuroscience*, 4, 221,  
916 2010.  
917  
918 **Burns, J. K., Nashed, J. Y., and Blohm, G.**, *Head roll influences perceived*  
919 *hand position. Journal of Vision.* 11(9):3, 1–9, 2011.  
920  
921 **Clark, J. J., and Yuille, A. L.**, Data fusion for sensory information processing  
922 systems. *Boston, MA: Kluwer*, 1990.  
923  
924 **Commentary: Sober, S. J., and Körding, K.**, What silly postures tell us about  
925 the brain? *Front. Neurosci.* 6:154, 2012.  
926  
927 **Cordo, P. J., Flores-Vieira, C., Verschueren, S. M. P., Inglis, J. T., and**  
928 **Gurfinke.**, Positions sensitivity of human muscle spindles: Single afferent and  
929 population representations. *J. Neurophysiol.* 87, 1186–1195, 2002.  
930  
931 **Crawford, J. D., Medendorp, W. P., & Marotta, J. J.**, Spatial transformations for  
932 eye–hand coordination. *Journal of Neurophysiology*, 92, 10–19, 2004.  
933  
934 **Cullen, K. E.**, The vestibular system: Multimodal integration and encoding of  
935 self-motion for motor control. *Trends in Neurosciences*, 35(3), 185–196, 2012.  
936 <https://doi.org/10.1016/j.tins.2011.12.001>  
937  
938 **Ernst, M. O., and Banks, M. S.**, Humans integrate visual and haptic information  
939 in a statistically optimal fashion. *Nature*, 415, 429, 2002.  
940  
941 **Ernst, M. O., and Bühlhoff, H. H.**, Merging the senses into a robust percept.  
942 *Trends in Cognitive Sciences*, 8(4), 162-169, 2004.  
943  
944 **Faisal, A. A., Selen, L. P., and Wolpert, D. M.**, Noise in the nervous system.  
945 *Nature Reviews Neuroscience*, 9, 292, 2008.  
946  
947 **Fernandez, C., Goldberg, J. M., and Abend, W. K.**,. Response to static tilts of  
948 peripheral neurons innervating otolith organs of the squirrel monkey. *J.*  
949 *Neurophysiol.* 35, 978–987, 1972.  
950  
951 **Flanders, M., Tillery, S., and Soechting, J.**, Early stages in a sensorimotor  
952 transformation. *Behavioral and Brain Sciences*, 15(2), 309-320, 1992.  
953  
954 **Gandevia S., C., McCloskey DI, Burke D.** **Kinaesthetic**, signals and muscle  
955 contraction. *Trends in Neuro- logical Science*,15: 62–65, 1992.  
956  
957 **Gellman, R. S., and Fletcher, W. A.**, Eye position signals in human saccadic  
958 processing. *Exp. Brain Res.* 89, 425–434, 1992.

- 959  
960 **Goodwin, G. M., McCloskey, D. I., and Mathews, P. B. C.**, The contribution of  
961 muscle afferents to kinesthesia shown by vibration induced illusions of movement  
962 and by the effect of paralysing joint afferents. *Brain* 95, 705–748, 1972.  
963  
964 **Henriques, D. Y., & Crawford, J. D.**, Role of eye, head, and shoulder geometry  
965 in the planning of accurate arm movements. *Journal of Neurophysiology*, 87,  
966 1677–1685, 2002.  
967  
968 **Henriques, D. Y., Medendorp, W. P., Gielen, C. C., & Crawford, J. D.**,  
969 Geometric computations underlying eye–hand coordination: Orientations of the  
970 two eyes and the head. *Experimental Brain Research*, 152, 70–78, 2003.  
971  
972 **Jacobson, M. T., Matthews, P.**, Generating uniformly distributed random Latin  
973 squares. *Journal of Combinatorial Designs*. 4 (6): 405–437, 1996.  
974  
975 **Jones, L. A.**. Peripheral mechanisms of touch and proprioception. *Canadian*  
976 *Journal of Pharmacology* 72: 484–487, 1994.  
977  
978 **Kersten, D., Mamassian, P., and Yuille, A.**, Object perception as Bayesian  
979 inference. *Annu. Rev. Psychol.* 55, 271–304, 2004.  
980  
981 **Knill, D. C., and Pouget, A.**, The Bayesian brain: the role of uncertainty in  
982 neural coding and computation. *Trends Neurosci.* 27, 712–719.  
983  
984 **Knudsen, E. I., Lac, S., and Esterly, S. D.**, Computational maps in the brain.  
985 *Annual Review of Neuroscience*, 10(1), 41-65, 1987.  
986  
987 **Körding, K. P., and Wolpert, D. M.**, Bayesian decision theory in sensorimotor  
988 control. *Trends in Cognitive Sciences*, 10(7), 319-326, 2006.  
989  
990 **Körding, K. P., Beierholm, U., Ma, W. J., Quartz, S., Tenenbaum, J. B.,**  
991 **Shams L.**, Causal Inference in Multisensory Perception. *PLoS ONE* 2(9): e943.  
992  
993 **Landy, M. S., and Kojima, H.**, Ideal cue combination for localizing texture-  
994 defined edges. *J. Opt. Soc. Am. A.* 18, 2307–2320, 2001.  
995  
996 **Landy, M. S., Maloney, L., Johnston, E. B., and Young, M.**, Measurement and  
997 modeling of depth cue combination: in defense of weak fusion. *Vision Res.* 35,  
998 389–412, 1995.  
999  
1000 **Lechner-Steinleitner, S.**, Interaction of labyrinthine and somatoreceptor inputs  
1001 as determinants of the subjective vertical. *Psychol. Res.* 40, 65–76, 1987.  
1002  
1003 **Li, W., and Matin, L.**, Visual direction is corrected by a hybrid extraretinal eye  
1004 position signal. *Ann. N.Y. Acad. Sci.* 656, 865–867, 1992.  
1005

- 1006 **Linkenauger, S. A., Witt, J. K., Bakdash, J. Z., Stefanucci, J. K., & Proffitt, D.**  
1007 **R.,** Asymmetrical body perception: A possible role for neural body  
1008 representations. *Psychological Science*, 20, 1373–1380, 2009.  
1009
- 1010 **Linkenauger, S.A., Witt, J.K., Stefanucci, J.K., Bakdash, J.Z., and Proffitt,**  
1011 **D.R.,** The effects of handedness and reachability on perceived distance. *Journal*  
1012 *of Experimental Psychology: Human Perception and Performance*, 35, 1649–  
1013 1660, 2009.  
1014
- 1015 **Ma, W. J., Beck, J. M., Latham, P. E. & Pouget, A.,** Bayesian inference with  
1016 probabilistic population codes. *Nature Neuroscience*. 9, 1432–1438, 2006.  
1017
- 1018 **Mergner, T., Nardi, G. L., Becker, W., & Deecke, L.,** The role of canal-neck  
1019 interaction for the perception of horizontal trunk and head rotation. *Experimental*  
1020 *Brain Research*, 49(2), 198–208, 1983. <https://doi.org/10.1007/BF00238580>  
1021
- 1022 **Menrgner, T., Siebold, C., Schweigart, G., & Becker, W.,** *BrainR. Experimental*  
1023 *Brain Research*, 389–404, 1991.  
1024
- 1025 **Mergner, T., Huber, W., Becker, W.,** Vestibular-neck interaction and  
1026 transformation of sensory coordinates. *J Vestib Res*, 347-36, 1997.  
1027
- 1028 **Mikula, L., Gaveau, V., Pisella, L., Khan, Z., A., and Blohm, G.,** Learned rather  
1029 than online relative weighting of visual-proprioceptive sensory cues, *in press*,  
1030 2018.  
1031
- 1032 **Pitcow, X., and Angelaki, D.,** How the brain might work: statistics flowing in  
1033 redundant population codes. [arXiv:1702.03492v2](https://arxiv.org/abs/1702.03492v2)  
1034
- 1035 **Press, S.J.,** Bayesian statistics: principles, models and applications, *Wiley, New*  
1036 *York*, 1990.  
1037
- 1038 **Proske, U., & Gandevia, S. C.,** The Proprioceptive Senses: Their Roles in  
1039 Signaling Body Shape, Body Position and Movement, and Muscle Force.  
1040 *Physiological Reviews*, 92(4), 1651–1697, 2012.  
1041 <https://doi.org/10.1152/physrev.00048.2011>  
1042
- 1043 **Sadeghi, S. G., Chacron, M. J., Taylor, M. C., and Cullen, K. E.,** Neural  
1044 variability, detection thresholds, and information transmission in the vestibular  
1045 system. *J. Neurosci.* 27, 771–781, 2007.  
1046
- Scott, S. H. and Loeb, G. E.,** The computation of position sense from spindle afferents in  
1047 mono- and multiarticular muscles. *J. Neurosci.* 14, 7529–7540, 1994. 1048  
1049
- Schlicht, E. J., and Schrater, P. R.,** Impact of coordinate transformation  
1050 uncertainty on human sensorimotor control. *Journal of Neurophysiology*, 97(5),  
1051 4203–4214, 2007. 1052



- 1053  
1054 **Stein, B. E., and Meredith, M. A.**, *The Merging of the Senses*. Cambridge, MA:  
1055 MIT Press, 1993.  
1056  
1057 **Stein, B. E., and Stanford, T. R.**, Multisensory integration: current issues from  
1058 the perspective of the single neuron. *Nat. Rev. Neurosci.* 9, 255–266, 2008.  
1059  
1060 **Sober, S. J., and Sabes, P. N.**, Multisensory integration during motor planning.  
1061 *Journal of Neuroscience*, 23(18), 6982-6992, 2003.  
1062  
1063 **Sober, S. J., and Sabes, P. N.**, Flexible strategies for sensory integration during  
1064 movement planning. *Nature Neuroscience*, 8, 490, 2005.  
1065  
1066 **Sober SJ and Körding K** (2012). What silly postures tell us about the  
1067 brain. *Front. Neurosci.* 6:154  
1068  
1069 **Soechting, J. F., and Flanders, M.**, Moving in three-dimensional space: Frames  
1070 of reference, vectors, and coordinate systems. *Annual Review of Neuroscience*,  
1071 15(1), 167-191, 1992.  
1072  
1073 **Tsay, A., Savage, G., Allen, T. J., & Proske, U.**, Limb position sense,  
1074 proprioceptive drift and muscle thixotropy at the human elbow joint. *Journal of*  
1075 *Physiology*, 592(12), 2679–2694, 2014.  
1076 <https://doi.org/10.1113/jphysiol.2013.269365>  
1077  
1078 **Van Beuzekom, A. D., and Van Gisbergen, J. A. M.**, Properties of the internal  
1079 representation of gravity inferred from spatial-direction and body-tilt estimates. *J.*  
1080 *Neurophysiol.* 84, 11–27, 2000.  
1081  
1082 **Van Beers, R. J., Sittig, A. C. & Denier van der Gon, J. J.** Integration of  
1083 proprioceptive and visual position information: An experimentally supported  
1084 model. *J. Neurophysiol.* 81, 1355–1364, 1999.  
1085  
1086 **Vetter, P., Goodbody, S. J., & Wolpert, D. M.**, Evidence for an eye-centered  
1087 spherical representation of the visuomotor map. *Journal of Neurophysiology*, 81,  
1088 935–939, 1999.  
1089  
1090 **Vingerhoets R. A., De Vrijer M., Van Gisbergen J. A., Medendorp W. P.**,  
1091 Fusion of visual and vestibular tilt cues in the perception of visual vertical.  
1092 *Journal of Neurophysiology* 101:1321–1333, 2009.  
1093  
1094 **Wade, S. W., and Curthoys, I. S.**, The effect of ocular torsional position on  
1095 perception of the roll-tilt of visual stimuli. *Vision Res.* 37, 1071–1078, 1997.  
1096  
1097 **Williams, J. S.**, A confidence interval for variance components, *Biometrika*, 49,  
1098 278 281, 1962.

1099 **Supplementary materials**

1100

1101           In this section we provide more details of how our model performs RFTs  
1102 on different sensory signals (modeled as Gaussian distributions). In the  
1103 manuscript, we demonstrated that the proposed model was able to replicate our  
1104 behavioral data pattern (Figure 9). In this section, we use the model to provide a  
1105 mechanistic explanation of the observed reach movement patterns.

1106           Sober and Sabes (2003) demonstrated that reaching errors caused by  
1107 dissociating visual and proprioceptive information can be explained by two  
1108 components: MV error that is the error at the vector planning stage and INV error  
1109 which is the error at the motor command generation stage. They showed that  
1110 adding these two reaching errors leads to the error pattern observed in human  
1111 participants. Furthermore, Burns and Blohm (2010) demonstrated that the  
1112 observed up- and downward shifts in reaching error curves can be explained by  
1113 RFTs; any misestimation in the sensed head angle results in an erroneous  
1114 rotation of movement vector which results in up- and downward shifts in reach  
1115 error curves. The logic is the same in our model for explaining the observed  
1116 biases in reach error curves for the head roll condition. Similarly, the up/down -  
1117 ward shifts in reach error curves for the neck load condition can be explained by  
1118 erroneous RFTs; applying a neck load biases the head angle, which leads to an  
1119 erroneous rotation of the movement vector, resulting in shifts of error curves.

1120           Applying a neck load enabled us to evaluate the contribution of neck  
1121 muscle spindle information to head angle estimation. To achieve this we included  
1122 a Bayesian head angle estimator in our model in which the visual/vestibular and

1123 neck muscle spindle information are integrated to estimate the head angle.  
1124 Applying a neck load biases the neck muscle spindle information toward the  
1125 direction of the load and consequently biases the head angle estimation  
1126 (equations 7 and 8). This bias in estimated head angle depends on two  
1127 parameters: 1) relative neck muscle reliability compared to visual/vestibular  
1128 reliability and 2) overall head angle estimation variability (similar to the variable  
1129 RFTs variance in Burns and Blohm's (2010) model)**Error! Reference source**  
1130 **not found..**

1131 As explained before, in our model we estimate the head angle by  
1132 integrating visual/vestibular information with neck muscle information. As a result,  
1133 the overall sensed head angle variability depends on the variability of each of  
1134 aforementioned information. Consider the situation in which overall head angle  
1135 estimation variability is low (**Error! Reference source not found.** Figure S1 A-  
1136 B). Low variability for head angle estimation resulted from high reliability for both  
1137 visual/vestibular and neck muscle spindle information. Similarly, high variability of  
1138 head angle estimation resulted from low reliability of both visual/vestibular and  
1139 neck muscle spindle information and consequently applying neck load creates  
1140 smaller biases (**Error! Reference source not found.** Figure S1 C-D). We expect  
1141 that applying a neck load will create higher shifts in reach error curves for when  
1142 the reliability of sensed head angle is high compared to when the reliability of  
1143 sensed head angle is low, regardless of their relative contribution (compare  
1144 Figure S1A vs. Figure S1D and Figure S1B vs. Figure S1C).

1145 In addition, the amount of shifts in reach error curves depends on the  
1146 relative reliability of neck muscle spindle information vs. visual/vestibular  
1147 information. When the relative reliability of neck muscle information is high, the  
1148 bias in reach error curves is higher compared to when its reliability is low (Figure  
1149 **S1Error! Reference source not found.B** vs. Figure S1C). In our data, we  
1150 observed high variability for head angle estimation as well as relatively higher  
1151 contribution of visual/vestibular information compared to neck muscle spindle  
1152 information ( ); Figure **S1Error! Reference source not found.C**.

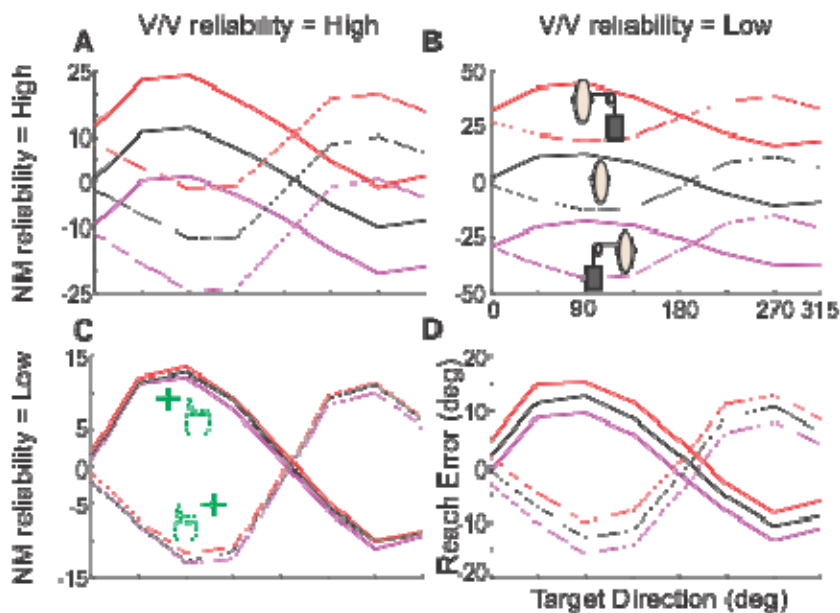

1153 **Figure S1. Effect of varying the reliability of neck muscle spindle signals**  
1154 **vs. visual/vestibular signals.** Head angle is estimated by combining the neck muscle spindle  
1155 information with combined visual and vestibular information using the Bayesian method, therefore, the effect  
1156 of applying neck load depends on two factors: 1) absolute variability of head angle estimation and 2) relative  
1157 reliability of neck muscle spindle information compared to visual/vestibular information. A-B) lower absolute  
1158 value for head angle estimation variability: this lower variability results from the high reliability of both  
1159 visual/vestibular and neck muscle information. Therefore, the up/down -ward shifts induced due to applying  
1160 neck load is higher compared with when the head angle estimation variability is high (panel C and D). In  
1161 addition to the absolute head angle estimation variability, the relative reliability of neck muscle spindle vs.  
1162 visual/vestibular information impacts how much applying neck load biases the reaching movement: A, C) the  
1163 lower the reliability of neck muscle spindle information vs. visual/vestibular information, the lower the  
1164 up/down ward shifts in reaching error curves, B, D) increasing the relative reliability of neck muscle  
1165 information increases the up/down ward shifts in reaching errors by applying neck load..  
1166

1167 As mentioned before, at the heart of our RFT process there is a head angle  
1168 estimator which enabled us to retrieve the sensed head angle based on the

1169 reach error patterns. Figure S2 demonstrates the biases in head angle estimation  
1170 for all the experimental conditions. As can be seen, applying neck load biased  
1171 the head angle estimation toward the applied neck load for all head angles. We  
1172 performed t-test analysis and observed that all the changes in head angle  
1173 estimation due to applying neck load are significant  $-11 < t(8) < 12$ ,  $p < 0.001$ .

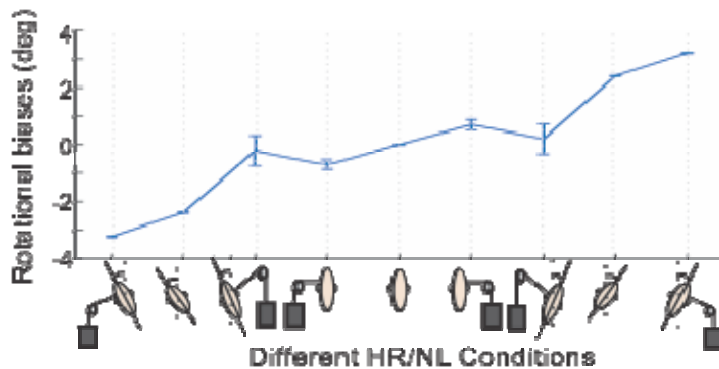

1174 **FigureS2. Biases in head angle estimation due to different head roll and**  
1175 **neck load conditions.** Applying neck load biased the head angle estimation toward the applied load  
1176 for all head angles. Error bars are standard deviations.  
1177

1178 In addition to up/down –ward shifts in reach error curves by applying neck load  
1179 and head roll, we observed a very surprising pattern in our data: both head roll  
1180 and neck load created greater biases in reaching movements when reaching to  
1181 targets away from the body (45-135 deg) compared to reaching to targets toward  
1182 the body (215-315 deg). This observation was surprising and to our knowledge  
1183 none of the previous models (Sober & Sabes 2003 and Burns & Blohm 2010)  
1184 could predict/explain this pattern.

1185 At this point it should come as no surprise that our model explains the difference  
1186 in head roll/neck load effect for different targets by stochastic RFTs processes.  
1187 Blohm and Crawford (2007) demonstrated that the brain considers the full 3D  
1188 body geometry to accurately plan reach movements. As mentioned in the model

1189 description, we included the 3D body geometry in our RFTs procedure: RFT  
1190 processes are carried out by sequential rotations/translations between different  
1191 coordinates centered on different body sections. Figure S3A demonstrates  
1192 different coordinates that have been considered in our model in relation to each  
1193 other. Including the 3D body geometry resulted in a displacement in the center of  
1194 rotation between different coordinates and specifically in our experiment between  
1195 gaze-centered and head-centered coordinates. This displacement of the center  
1196 of rotation caused greater biases in reaching movements for visual targets further  
1197 away from vs. closer to the body (Figure S3A). Figure S3B provides a detailed  
1198 example of how the difference in the center of rotation results in an asymmetry in  
1199 the movement biases induced by head roll/neck load. The first block in Figure  
1200 S3B shows the actual scene in front of the participants with two targets at 90deg  
1201 and 270deg. In our experiment the participants fixated their eyes on the cross  
1202 and this cross was indicated as their visual information of the initial hand position  
1203 as well. In this example, the hand was shifted 25cm horizontally to the right. The  
1204 dotted arrows show the visual movement vector toward the targets. Box #1  
1205 demonstrates the retinal representation of targets for head roll 30deg CCW. We  
1206 assumed that the torsion effect on retinal information was small and therefore  
1207 ignored it. Since the head is rotated 30deg CCW, the retinal image on the back  
1208 of the head is rotated 30deg CW (actual head angle) and the center of this  
1209 rotation is the cross (gaze-position). In order to estimate the hand position,  
1210 proprioceptive information must be transformed to the retinal coordinates and at  
1211 the heart of this transformation is the head rotation based on the estimated head

1212 angle (Blue box in figure 3). In this specific example, we assumed that the head  
1213 angle is overestimated by 5deg and is estimated as 35deg. In addition, since the  
1214 centers of rotation for head-centered and gaze-centered coordinates are  
1215 different, the transformed hand position is no longer in symmetry with the rotation  
1216 in gaze-centered coordinates and displaced and biased toward the body. The  
1217 next two steps in our model are multisensory integration to estimate the hand  
1218 position and movement vector calculations (Box #2). As it has been shown by  
1219 Sober and Sabes (2003, 2005) any transformation adds noise and therefore,  
1220 visual information is more reliable in the retinal coordinates and the estimated  
1221 initial hand position is biased toward the visual initial hand position and the  
1222 movement vector is calculated by subtracting target position from this estimated  
1223 initial hand position. This movement vector, then, is transformed into shoulder-  
1224 center coordinates to be executed, employing RFTs (Box #3). We compared the  
1225 transformed movement vector with the visual movement vector in Box #4 and as  
1226 it can be seen the misestimation in head angle created greater biases for target  
1227 away from the body (90deg) compared to the target toward the body (270deg).

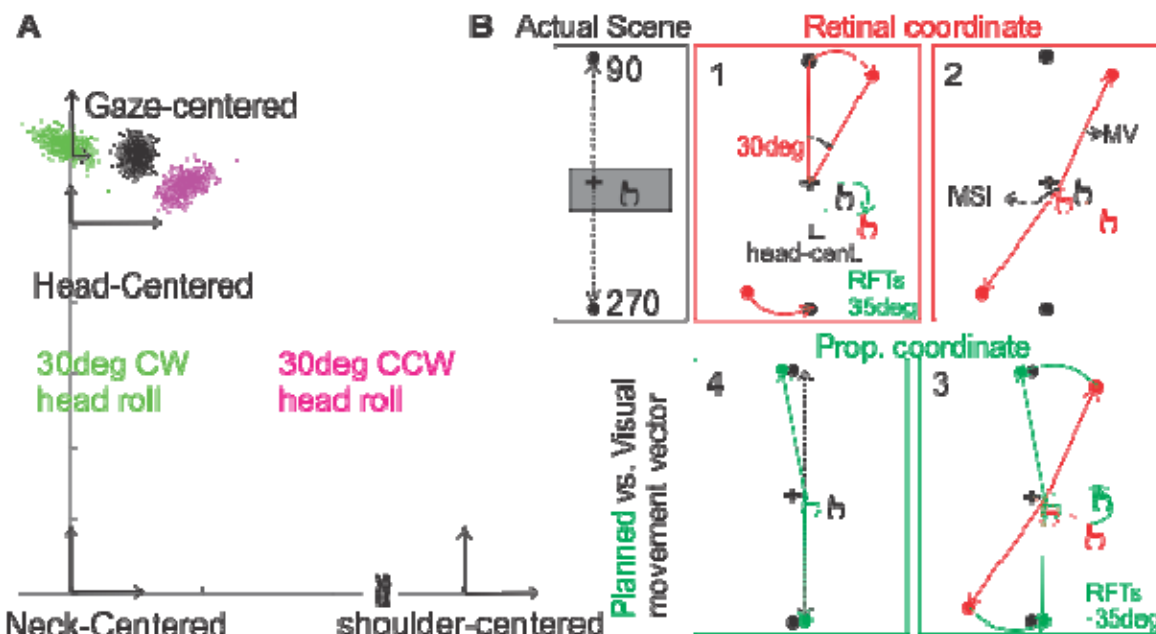

1228  
1229  
1230  
1231  
1232  
1233  
1234  
1235  
1236  
1237  
1238  
1239  
1240  
1241  
1242  
1243  
1244

**Figure S3. RFT processes mechanism.** A) Different coordinates in our RFT module. The difference in the center of rotation between gaze-centered coordinate and head-centered coordinate resulted in an asymmetry of transformed hand position for 30deg CW vs CCW head rolls. B) A detailed example of the higher effect of stochastic RFTs on movement away from the body compared to movements toward the body for head roll 30deg CCW: Actual scene: in our experiment, participants had fixated their eyes on the center cross and the visual feedback of the hand indicated their hand on the center as well. The actual hand position is shifted to the right in this example and it is occluded, Box#1: the retinal image of the target is rotated 30 CW, we ignored the torsion effects on retinal projection. Proprioceptive hand position is transformed using our RFT module (we assumed that head roll estimation is erroneous; 35deg), Box#2: Initial hand position is estimated by combining visual information and transformed proprioceptive information of the hand. Then, the movement vector is calculated by subtracting target position from the initial hand position, Box#3: The calculated movement vector is transformed to the proprioceptive coordinate using the RFTs module, Box#4: comparing the planned movement with the movement only considering visual information. As it can be seen, the misestimation in head angle, created larger error for movement away from body vs. movement toward the body. This happened due to the offset in the center of rotations between different coordinates.

1245  
1246  
1247  
1248  
1249  
1250  
1251

Determining how stochastic noise in RFTs modulates multi-sensory weights was one of the goals of this experiment. In figures 6 and 7, we fitted Sober and Sabes' (2003) model to the data and demonstrated that both head roll and neck load modulates multi-sensory integration weights. Similar to Burns and Blohm (2010), we were able to retrieve multisensory integration weights from the covariance matrices. As it has been demonstrated in figure S4, RFTs dramatically change the distribution of the transformed signal and consequently



1252 the covariance matrix (Alikhanian et al., 2015). In order to account for such  
1253 variations, we calculated the determinant of the covariance matrix for calculating  
1254 the multi-sensory weights. Figure S4 shows visual weights in both visual (A) and  
1255 proprioceptive (B) coordinates.

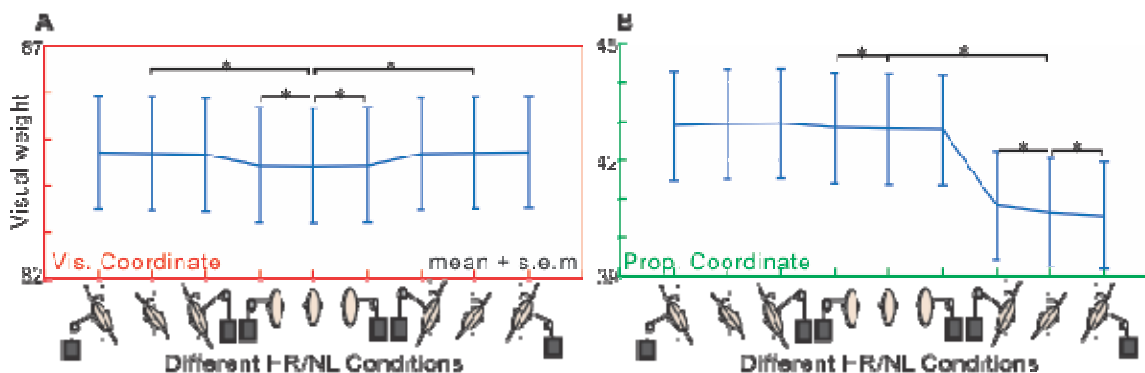

1256 **Figure S4. visual weights for multi-sensory integration.** A) Visual weights in visual  
1257 coordinate: Visual weights increase in visual coordinate due to decreased reliability of proprioceptive  
1258 information caused by stochastic RFTs, B) Visual weights in proprioceptive coordinate: rolling the head  
1259 30deg CCW didn't affect the visual weights while rolling the head 30deg CW decreased visual weights. The  
1260 reason for this asymmetry is the nonlinearity in the inverse kinematic process. Error bars are standard error  
1261 of the mean. The significance was tested using paired t-test ( $P < 0.05$  is considered as a significant  
1262 difference).

1264 Visual weights were lowest for head straight and no load condition in visual  
1265 coordinates and increased by rolling the head and/or applying neck load. Our  
1266 paired t-test showed that this increase was significant for all head roll and neck  
1267 load conditions ( $t(8) < -3$ ,  $p < 0.05$ ). More specifically, applying the neck load  
1268 increased the visual weights in visual coordinate while the head was upright ( $t(8)$   
1269  $< -3$ ,  $p < 0.05$ ) while it didn't significantly change when the head wasn't upright  
1270 and neck load was applied ( $t(8) < -1$ ,  $p \approx 0.2$ ). Applying neck load or rolling the  
1271 head didn't significantly changed visual weights in visual coordinates except for  
1272 when the head rolled 30deg CW ( $t(8) < -18$ ,  $p < 0.001$ ) or the neck load applied  
1273 to the left side ( $t(8) < 3$ ,  $p < 0.05$ ). Combination of head roll and neck load only

1275 modulated the visual weights when the head was rolled 30deg CW and neck load  
1276 applied to the either sides ( $|t(8)| < 4$ ,  $p < 0.05$ ). Therefore, our data and model  
1277 show that both noise in RFTs and the geometry of the body can influence multi-  
1278 sensory integration in a way that is explained through changes in reliability of  
1279 transformed signal by stochastic and geometrically accurate RFT processes.
